# Supplementary material
Source: bioRxiv or medRxiv preprint supplement (https://www.biorxiv.org/highwire/filestream/14085/field_highwire_adjunct_files/0/051052-1.pdf)
Supplement: Supplementary file [file 051052-1.pdf]

# Supplementary Material

## Genomic positional conservation identifies topological anchor point (tap)RNAs linked to developmental loci

Paulo P. Amaral<sup>1\*</sup>, Tommaso Leonardi<sup>2,3\*</sup>, Namshik Han<sup>1\*</sup>, Emmanuelle Viré<sup>1†</sup>, Dennis K. Gascoigne<sup>1</sup>, Raúl Arias-Carrasco<sup>4</sup>, Magdalena Büscher<sup>1</sup>, Anda Zhang<sup>5</sup>, Stefano Pluchino<sup>3</sup>, Vinicius Maracaja-Coutinho<sup>4</sup>, Helder I. Nakaya<sup>6</sup>, Martin Hemberg<sup>1,7</sup>, Ramin Shiekhattar<sup>5</sup>, Anton J. Enright<sup>2</sup> and Tony Kouzarides<sup>1\*\*</sup>

<sup>1</sup>*The Gurdon Institute, University of Cambridge, Tennis Court Road, Cambridge, CB2 1QN, UK.*

<sup>2</sup>*EMBL-European Bioinformatics Institute, Wellcome Trust Genome Campus, Hinxton, Cambridgeshire, CB10 1SD, UK.*

<sup>3</sup>*Department of Clinical Neurosciences; Wellcome Trust-Medical Research Council Stem Cell Institute, University of Cambridge, Clifford Allbutt Building-Cambridge Biosciences Campus, Hills Road, Cambridge, CB2 0PY, UK.*

<sup>4</sup>*Centro de Genómica y Bioinformática, Facultad de Ciencias, Universidad Mayor, Camino La Pirámide 5750, Huechuraba, Santiago, 8580000, Chile*

<sup>5</sup>*University of Miami Miller School of Medicine, Sylvester Comprehensive Cancer Center, Department of Human Genetics, Biomedical Research Building, Miami, FL 33136, USA.*

<sup>6</sup>*School of Pharmaceutical Sciences, University of São Paulo, Av. Prof. Lineu Prestes 580, São Paulo 05508, Brazil.*

<sup>7</sup>*Wellcome Trust Sanger Institute, Wellcome Trust Genome Campus, Hinxton, CB10 1SA, UK.*

<sup>†</sup> *Present address: MRC Prion Unit, UCL Institute of Neurology, Queen Square House, Queen Square, London WC1N 3BG.*

*\* Equal first authors*

*\*\* Correspondence: t.kouzarides@gurdon.cam.ac.uk*

May 4, 2016

## Contents

|          |                                                                      |           |
|----------|----------------------------------------------------------------------|-----------|
| <b>1</b> | <b>Supplementary Figures</b>                                         | <b>3</b>  |
| <b>2</b> | <b>Supplementary Table Legends</b>                                   | <b>24</b> |
| <b>3</b> | <b>Supplementary Methods</b>                                         | <b>25</b> |
| 3.1      | Human and Mouse reference genomes . . . . .                          | 25        |
| 3.2      | Human and Mouse reference transcriptomes . . . . .                   | 25        |
| 3.3      | Genbank all RNAs . . . . .                                           | 25        |
| 3.4      | RNA-Sequencing data analysis . . . . .                               | 25        |
| 3.4.1    | Mapping . . . . .                                                    | 25        |
| 3.4.2    | Assembly . . . . .                                                   | 25        |
| 3.4.3    | Abundance estimation and expression normalisation . . . . .          | 26        |
| 3.5      | Identification of pcRNAs . . . . .                                   | 26        |
| 3.5.1    | Human Data preparation . . . . .                                     | 26        |
| 3.5.2    | Mouse Data preparation . . . . .                                     | 27        |
| 3.5.3    | Identification of conserved promoters . . . . .                      | 28        |
| 3.5.4    | Non-coding to coding positional annotation . . . . .                 | 28        |
| 3.5.5    | Human-mouse positional comparison . . . . .                          | 29        |
| 3.5.6    | Annotation of pcRNA genomic characteristics . . . . .                | 29        |
| 3.6      | Characterisation of pcRNA features and expression analysis . . . . . | 29        |
| 3.6.1    | pcRNA expression heatmaps . . . . .                                  | 29        |
| 3.6.2    | pcRNA expression distance heatmaps . . . . .                         | 30        |
| 3.6.3    | GO enrichment of pcRNA-associated coding genes . . . . .             | 30        |

|        |                                                                                                        |    |
|--------|--------------------------------------------------------------------------------------------------------|----|
| 3.6.4  | Correlation of expression between pcRNAs and coding genes and between human and mouse pcRNAs . . . . . | 30 |
| 3.6.5  | Tissue specificity score and GO enrichment by tissue . . . . .                                         | 30 |
| 3.6.6  | Human-mouse conservation analysis . . . . .                                                            | 31 |
| 3.7    | Nanostring analysis . . . . .                                                                          | 31 |
| 3.8    | FOXA2-DS-S knock-down microarray analysis . . . . .                                                    | 31 |
| 3.9    | Microarray meta-analysis . . . . .                                                                     | 32 |
| 3.10   | pcRNA histone modification profiles . . . . .                                                          | 32 |
| 3.11   | Analysis of H3K27me3 in ESCs . . . . .                                                                 | 32 |
| 3.12   | ENCODE ChIP-seq data analysis . . . . .                                                                | 32 |
| 3.13   | Known TF-binding motif data analysis . . . . .                                                         | 33 |
| 3.14   | Identification of CTCF binding sites in pcRNA promoters . . . . .                                      | 33 |
| 3.15   | Identification of HiC loops that overlap pcRNAs . . . . .                                              | 33 |
| 3.16   | TAD/Loop Boundary Enrichment Analysis . . . . .                                                        | 34 |
| 3.17   | PhastCons Conservation Analysis . . . . .                                                              | 34 |
| 3.18   | Conserved domain search . . . . .                                                                      | 34 |
| 3.18.1 | Motif search in conserved domains . . . . .                                                            | 34 |
| 3.18.2 | Consensus motifs and De novo motif discovery . . . . .                                                 | 35 |
| 3.18.3 | Enriched motif search in enhancer region of the other end of loop anchor points . . . . .              | 35 |

**4 Supplementary References 35**

# 1 Supplementary Figures

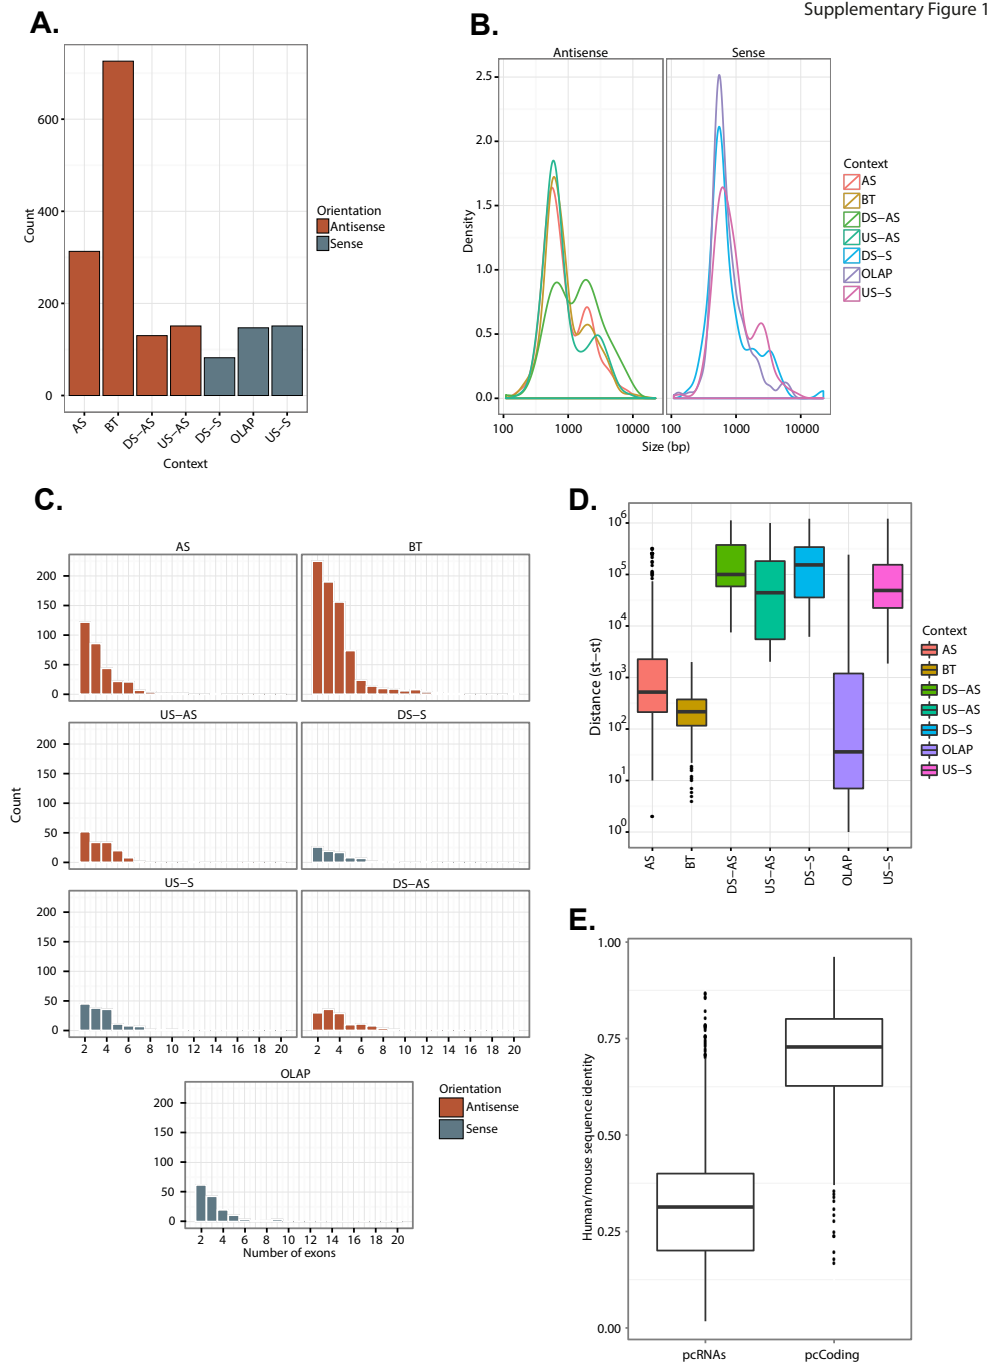

Figure 1: **A:** Bar chart showing the number of pcRNAs in each orientation. **B:** Density distribution of the distance between pcRNAs and respective coding genes, color-coded by positional orientation. The left plot shows pcRNA in antisense orientations, while the right plot shows pcRNAs in sense orientations. **C:** Bar chart showing exon-number distribution for each pcRNA. **D:** Boxplot showing the distribution of the distances between the TSS of pcRNAs and the TSS of their corresponding coding gene. **E:** Boxplot showing the fraction of sequence identity between human and mouse pcRNAs and human and mouse pcRNA-associated protein coding genes. Sequence identity was calculated with the Needleman-Wunsch algorithm (Needleman and Wunsch, 1970).

**A.**

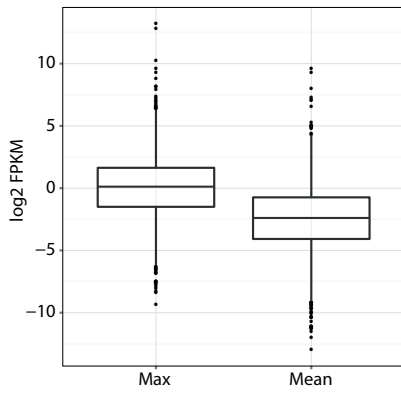

**B.**

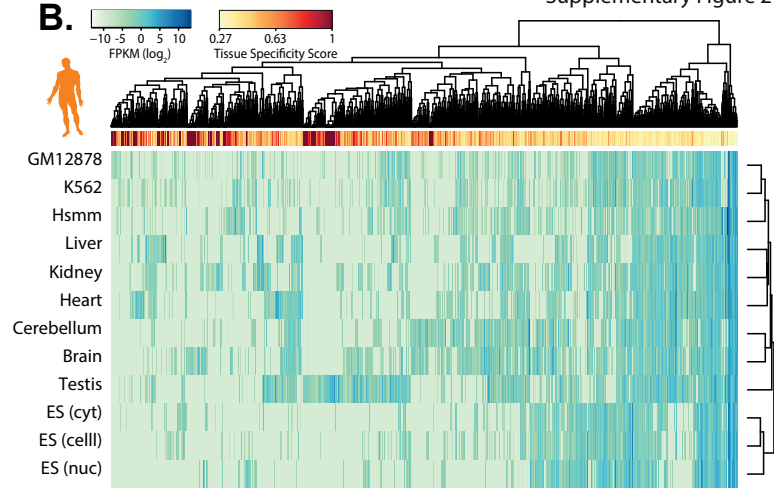

**C.**

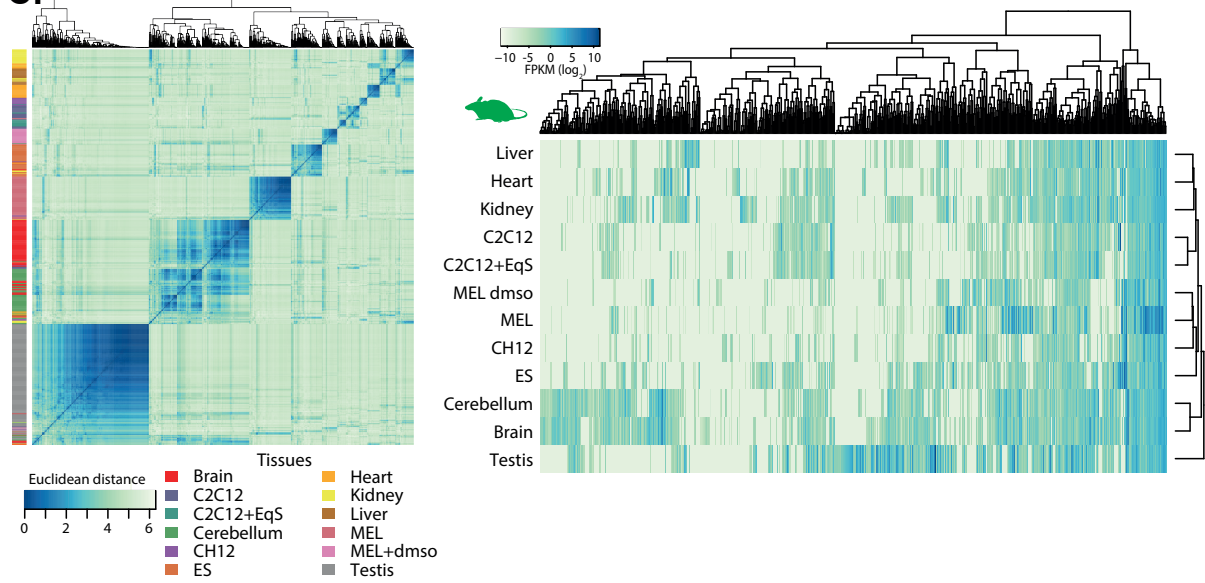

**D.**

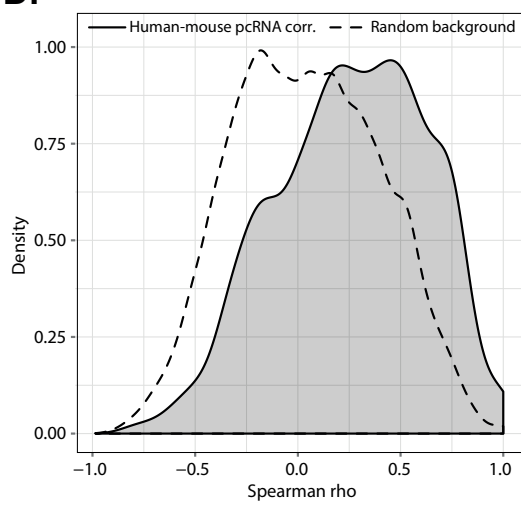

**E.**

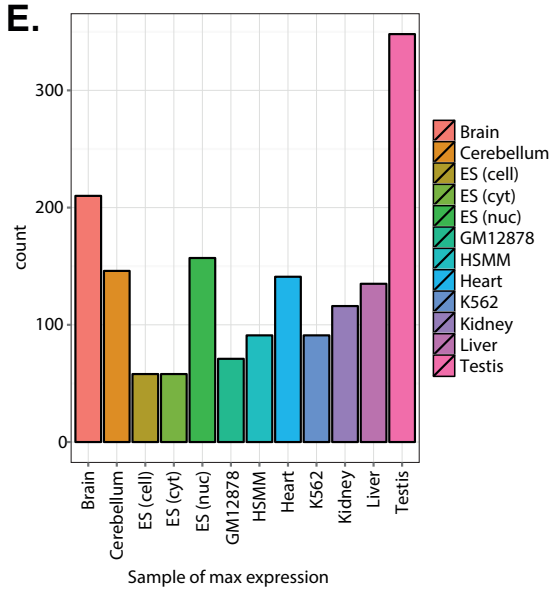

Figure 2: **A:** Boxplot showing the distribution of the highest FPKM measured across all samples for each pcRNA (left) and the mean FPKM across all samples for each pcRNA (right). **B:** Heatmap showing the expression profiles of human (top) and mouse (bottom) pcRNAs across tissues and cell lines. The horizontal sidebar reports the tissue specificity score of pcRNAs, ranging from 0.27 (white) to 1 (red). **C:** Heatmap showing the Euclidean distance between the expression profiles of mouse pcRNAs. The vertical sidebar reports the tissues in which each pcRNA has maximal expression. **D:** Density distribution of the Spearman's correlation coefficients between human and mouse pcRNA pairs. Mean Spearman's rho between human and mouse 0.26, permutation test  $p$ -value  $< 10^{-6}$ . The dotted line shows the background distribution of all pairwise Spearman's correlations between human and mouse pcRNAs. **E:** Bar chart showing the number of pcRNAs (y-axis) detected to have the highest expression in each given tissue (x-axis).

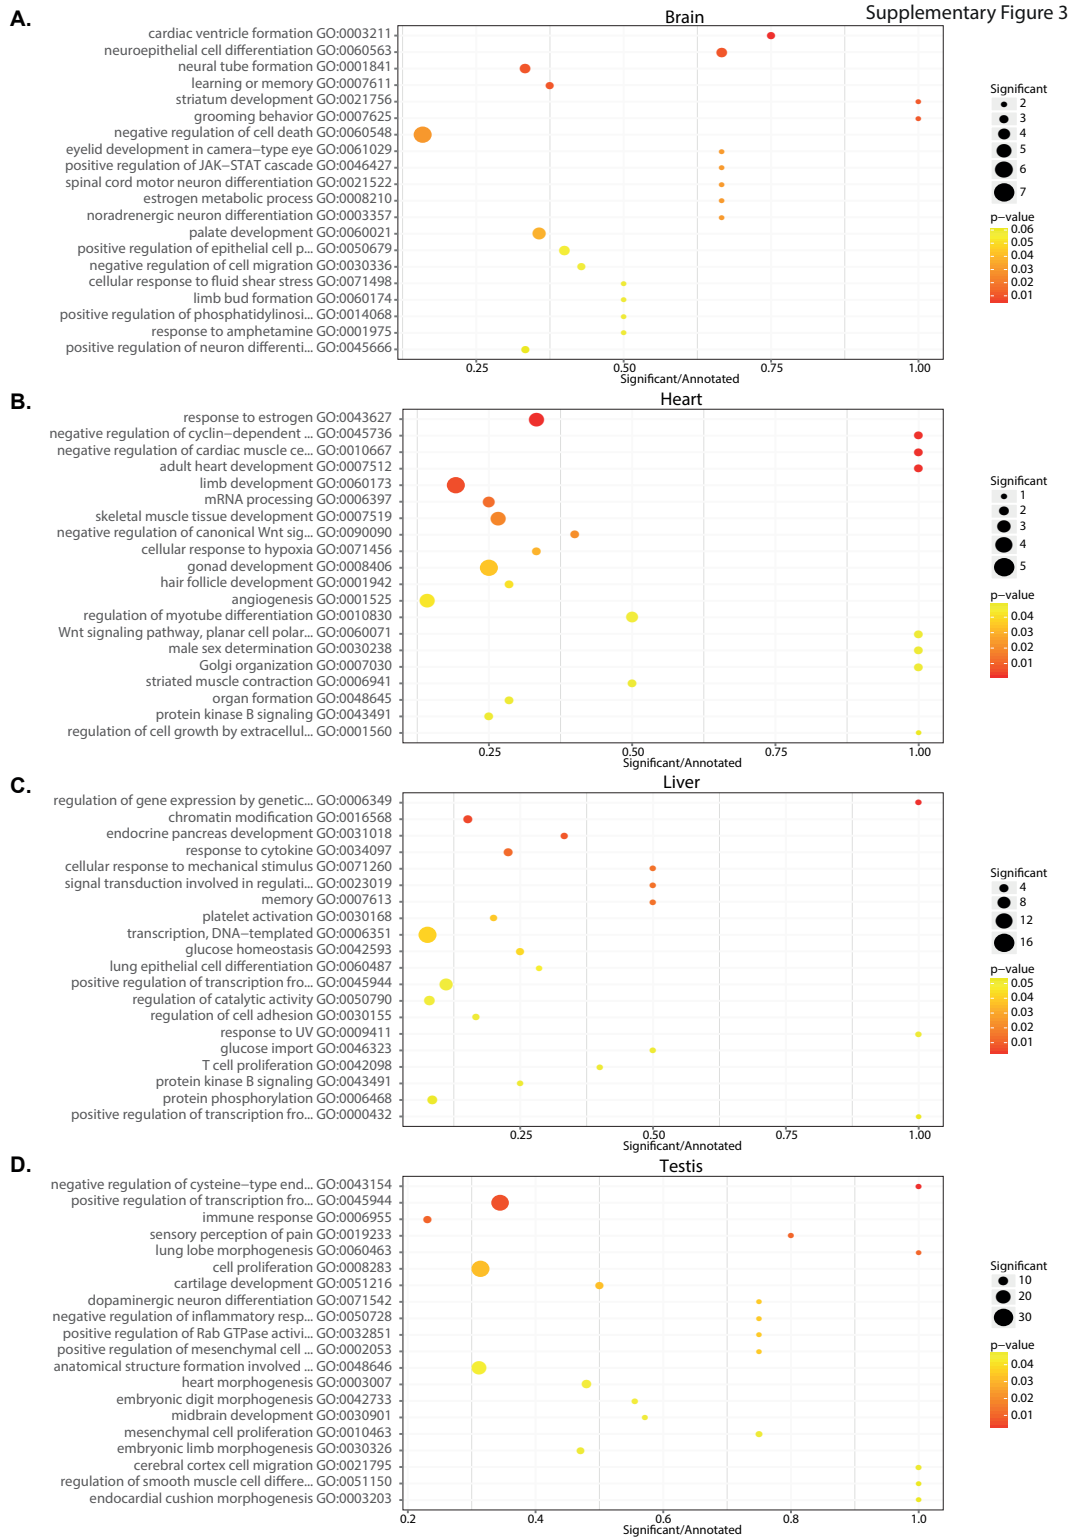

**A.**

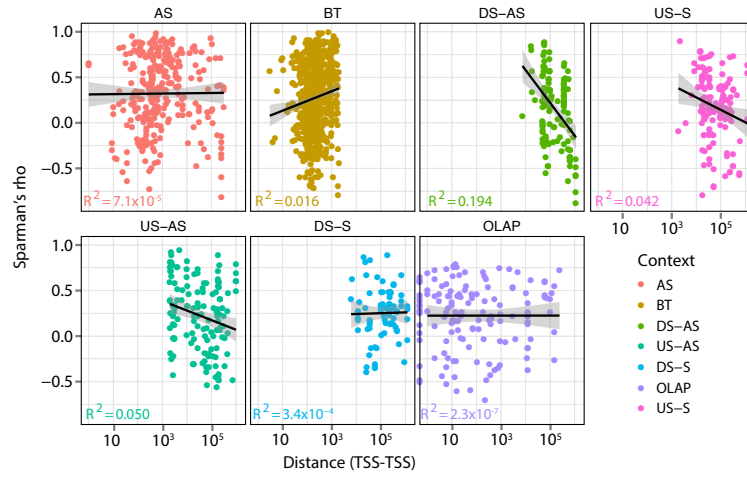

**B.**

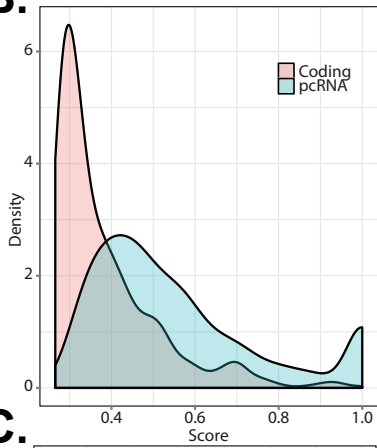

**C.**

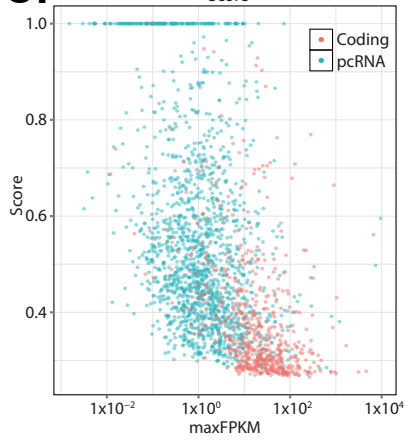

**D.**

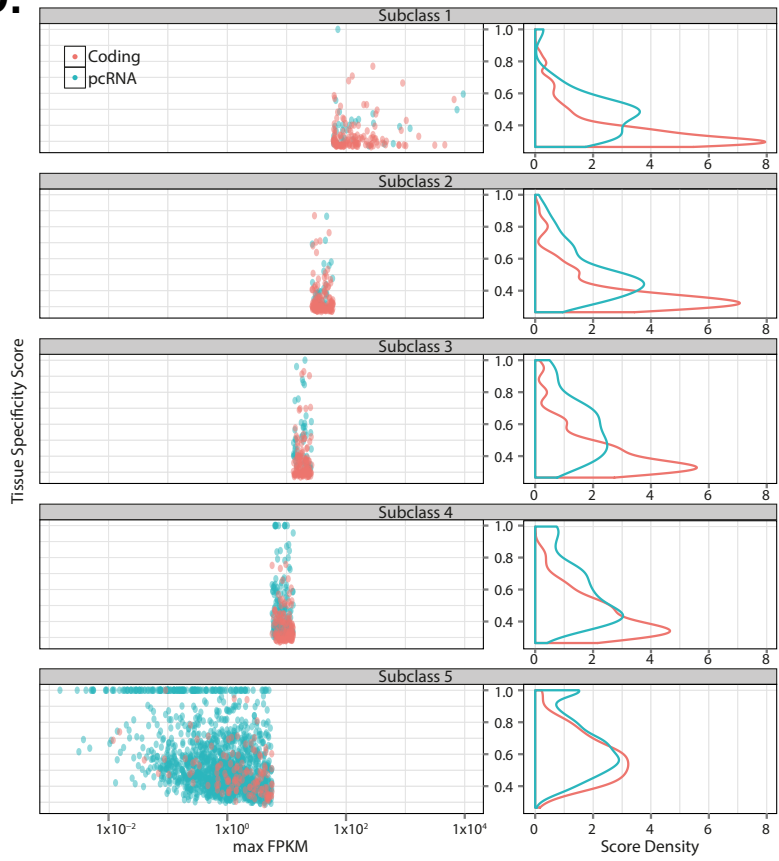

Figure 4: **A:** Plot showing the Spearman correlation coefficient between the expression of pcRNAs and their corresponding coding genes as a function of their distance (TSS to TSS), indicating independence of TSS to TSS distance ( $R^2=0.008$ ,  $p$ -value  $3.23 \times 10^{-4}$ ). The black lines represent the linear fit. **B:** Density distribution of the Tissue Specificity Score (see Supplementary Methods) for pcRNAs (blue) and pcRNA-associated coding genes (red) showing significant higher specificity for pcRNAs (mean pcRNA tissue specificity score 0.55, mean associated coding gene tissue specificity score 0.37,  $p$ -value  $4.25 \times 10^{-220}$ , Wilcoxon test). **C:** Scatterplot showing the highest FPKM observed across tissues ( $x$ -axis) for pcRNAs (blue) and pcRNA-associated coding genes (red) plotted against their tissue specificity score ( $y$ -axis). **D:** Scatterplot and density distribution of Tissue Specificity Scores for pcRNAs (blue) and pcRNA-associated coding genes (red) divided into 5 expression sub-groups. Each of the five sub-plots only displays pcRNAs and coding genes with similar expression levels (see Supplementary Methods) and shows the highest FPKM observed across tissues ( $x$ -axis) plotted against their tissue specificity score ( $y$ -axis). The right part of the plot shows the distribution of tissue specificity scores for each sub-group, showing that pcRNAs have higher tissue specificity score than pcRNA-associated coding genes independently of their expression level.



Supplementary Figure 5

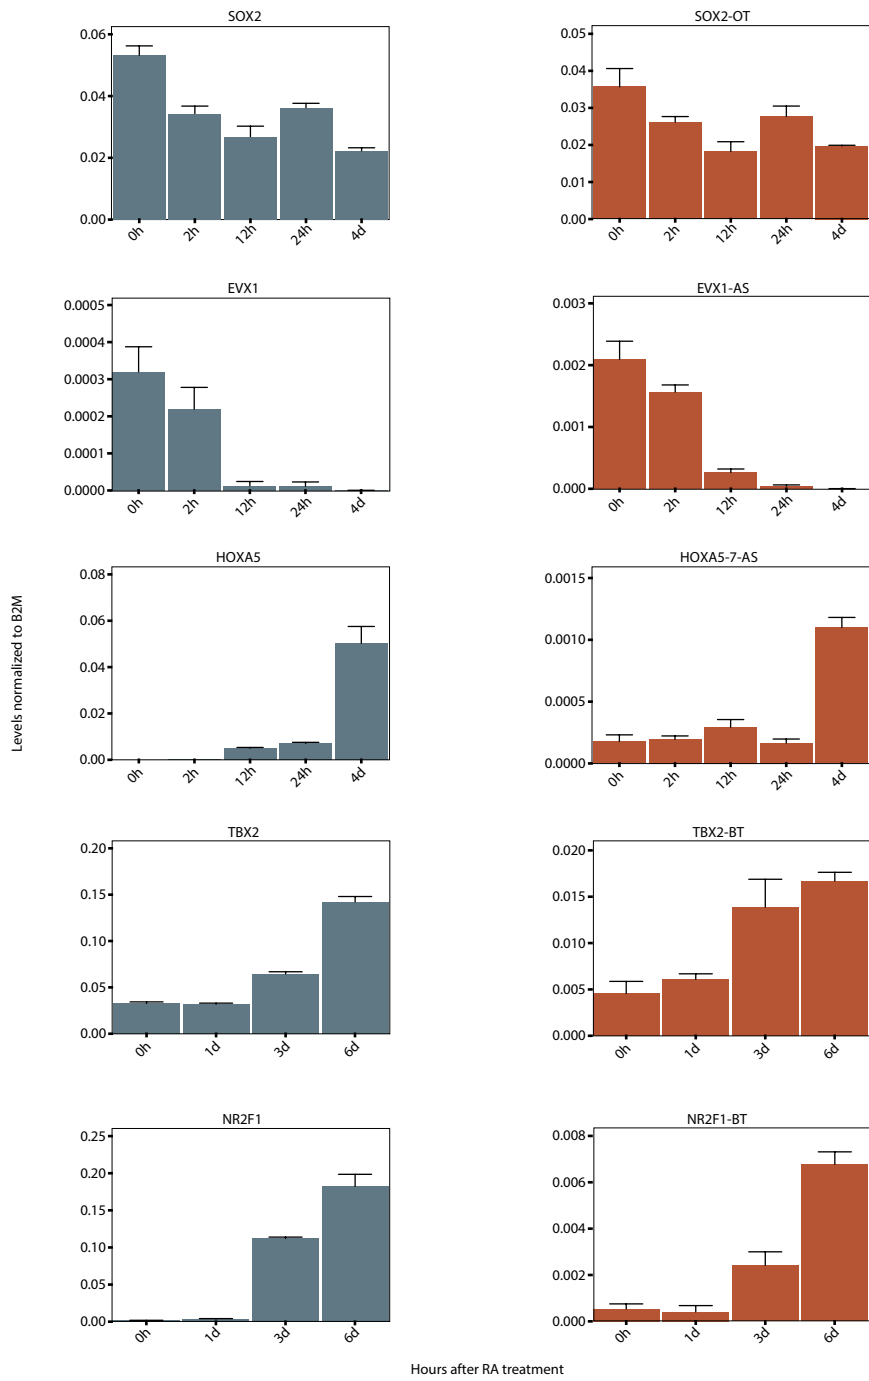

Figure 5: Real time PCR data showing the expression of SOX2, EVX1, HOXA5, TBX2, NR2F1 (left) and associated pcRNAs (right) over 5 time-points of NT2 cells differentiation with retinoic acid (RA). The data is expressed relative to the expression of B2M; the error bars indicate the standard error of the mean (SEM) across two replicate experiments.

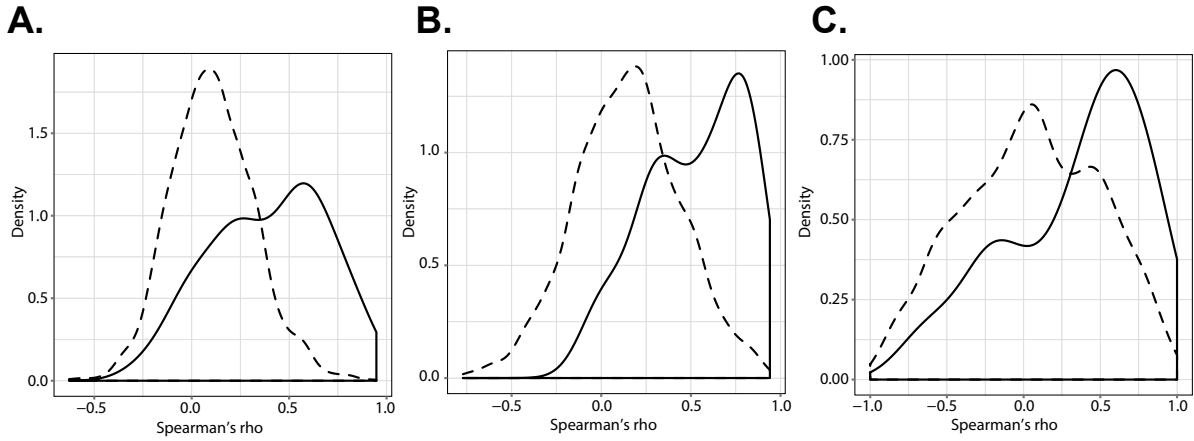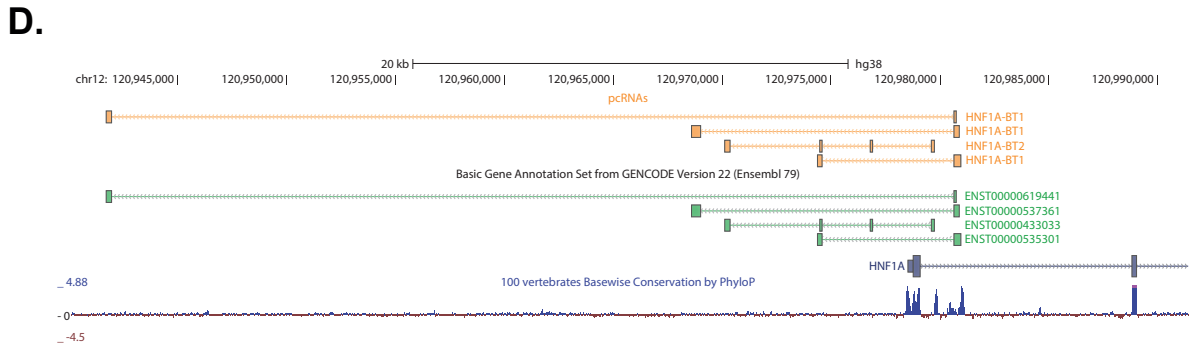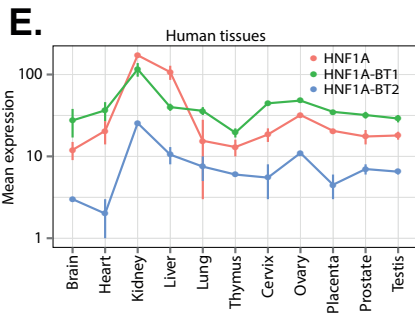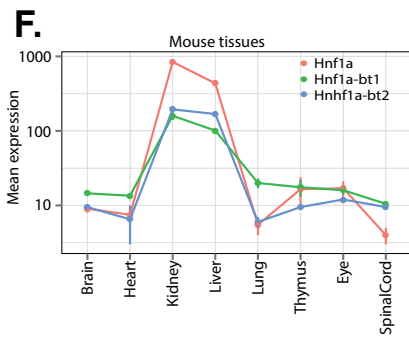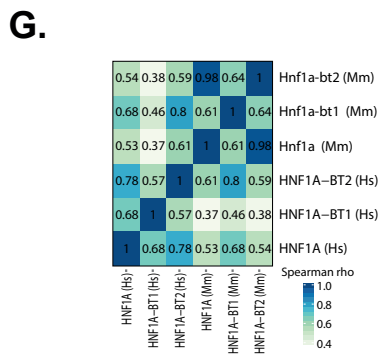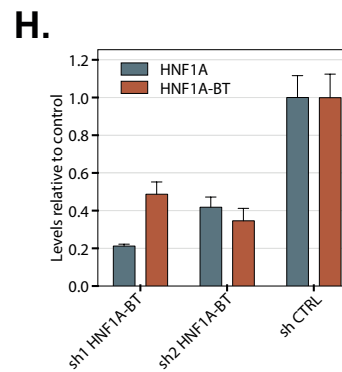

Figure 6: **A-B**: Density distribution of the Spearman's correlation coefficients calculated from Nanostring data for human (**A**) and mouse (**B**) pcRNAs and corresponding coding genes showing significant positive correlation (mean Spearman's rho 0.40 and 0.53 for human and mouse respectively, permutation test p-values  $<10^{-6}$ ). The dotted line shows the background distribution of all pairwise Spearman's correlations between pcRNAs and pcRNA-associated coding genes. **C**: Density distribution of the Spearman's correlation coefficients on Nanostring data between human and mouse pcRNAs pairs, showing conserved expression profiles across species (mean Spearman's rho 0.33, permutation test p-value  $<10^{-6}$ ). **D**: Illustration of the HNF1A locus modified from a screenshot of the UCSC genome browser. For clarity, only one representative isoform of the coding gene is displayed. **E,F**: Nanostring expression profiles of HNF1A and HNF1A-associated pcRNAs across human (**E**) and mouse (**F**) tissues. The plots report the mean value of two technical replicates, while the error bars report the value of each replicate. **G**: Heatmap showing Spearman's correlation coefficients between human and mouse HNF1A, HNF1A-BT1 and HNF1A-BT2. **H**: Real Time PCR data showing the expression of HNF1A and HNF1A-BT in HepG2 cells upon knock-down of HNF1A-BT. Sh1- and sh2- HNF1A-BT indicate two different, non-overlapping shRNAs designed against HNF1A-BT. The data is expressed relative to the expression of the control transfected with scrambled shRNAs; the error bars indicate the SEM across two replicate experiments.

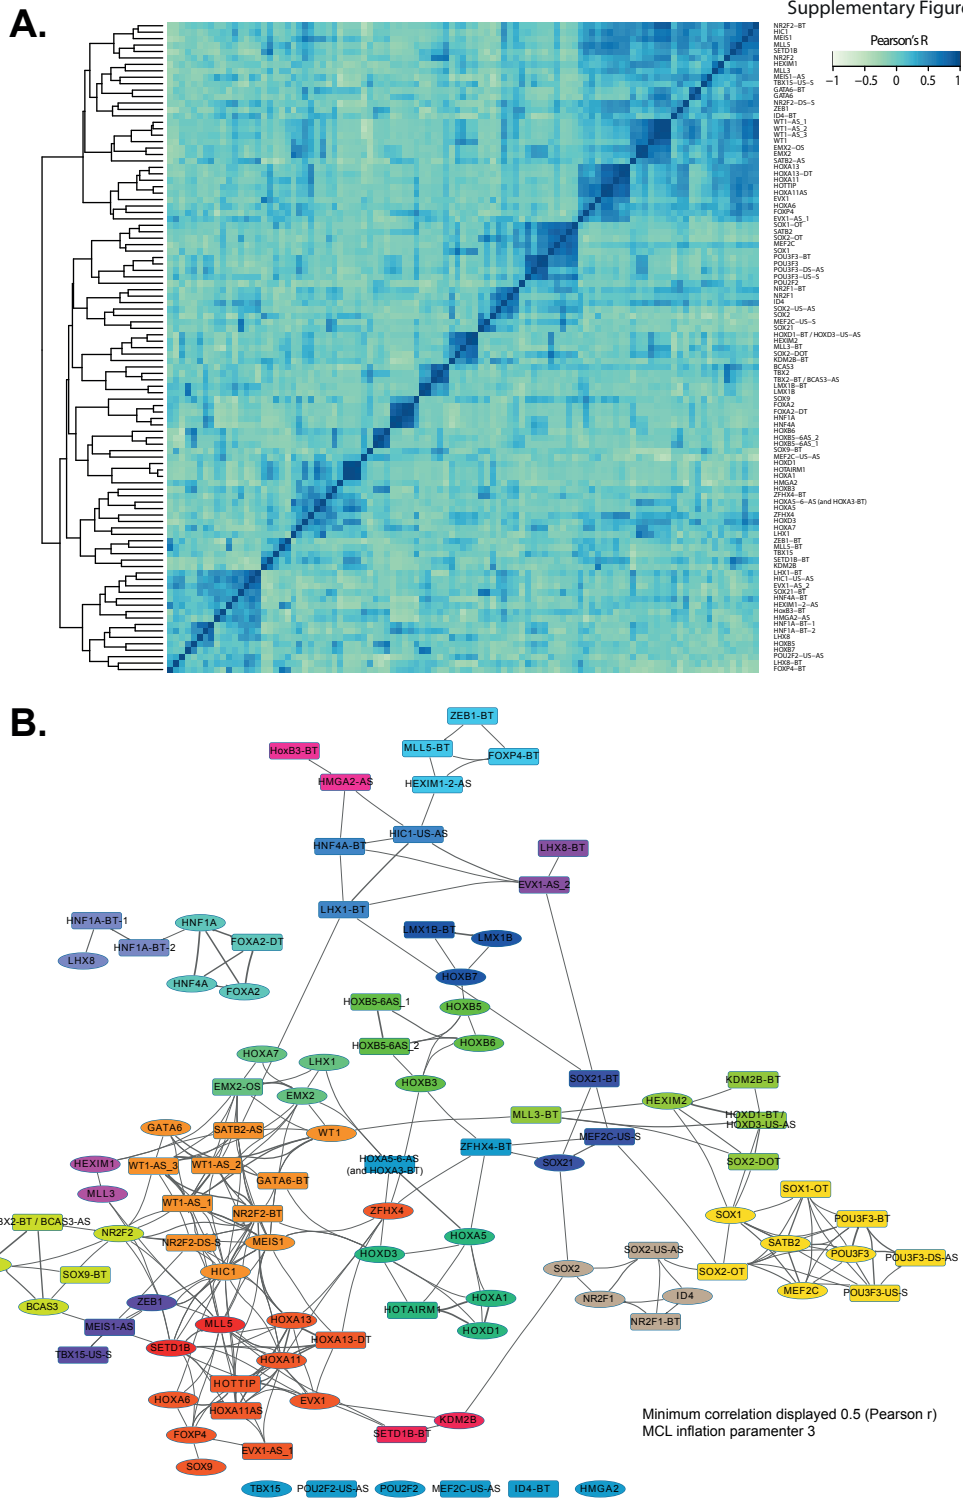

Figure 7: **A:** Heatmap showing the pairwise Pearson correlation coefficients between all human transcripts included in the Nanostring experiment (both pcRNAs and pcRNA-associated coding genes). **B:** Network displaying all human transcripts included in the Nanostring experiment (nodes) and the Pearson correlation coefficient between their expression profiles (edges). Only edges with correlation coefficient higher than 0.5 are shown. The color coding of the nodes indicates the result of applying the Markov Clustering Algorithm to the matrix of correlation coefficients (see Supplementary Methods).

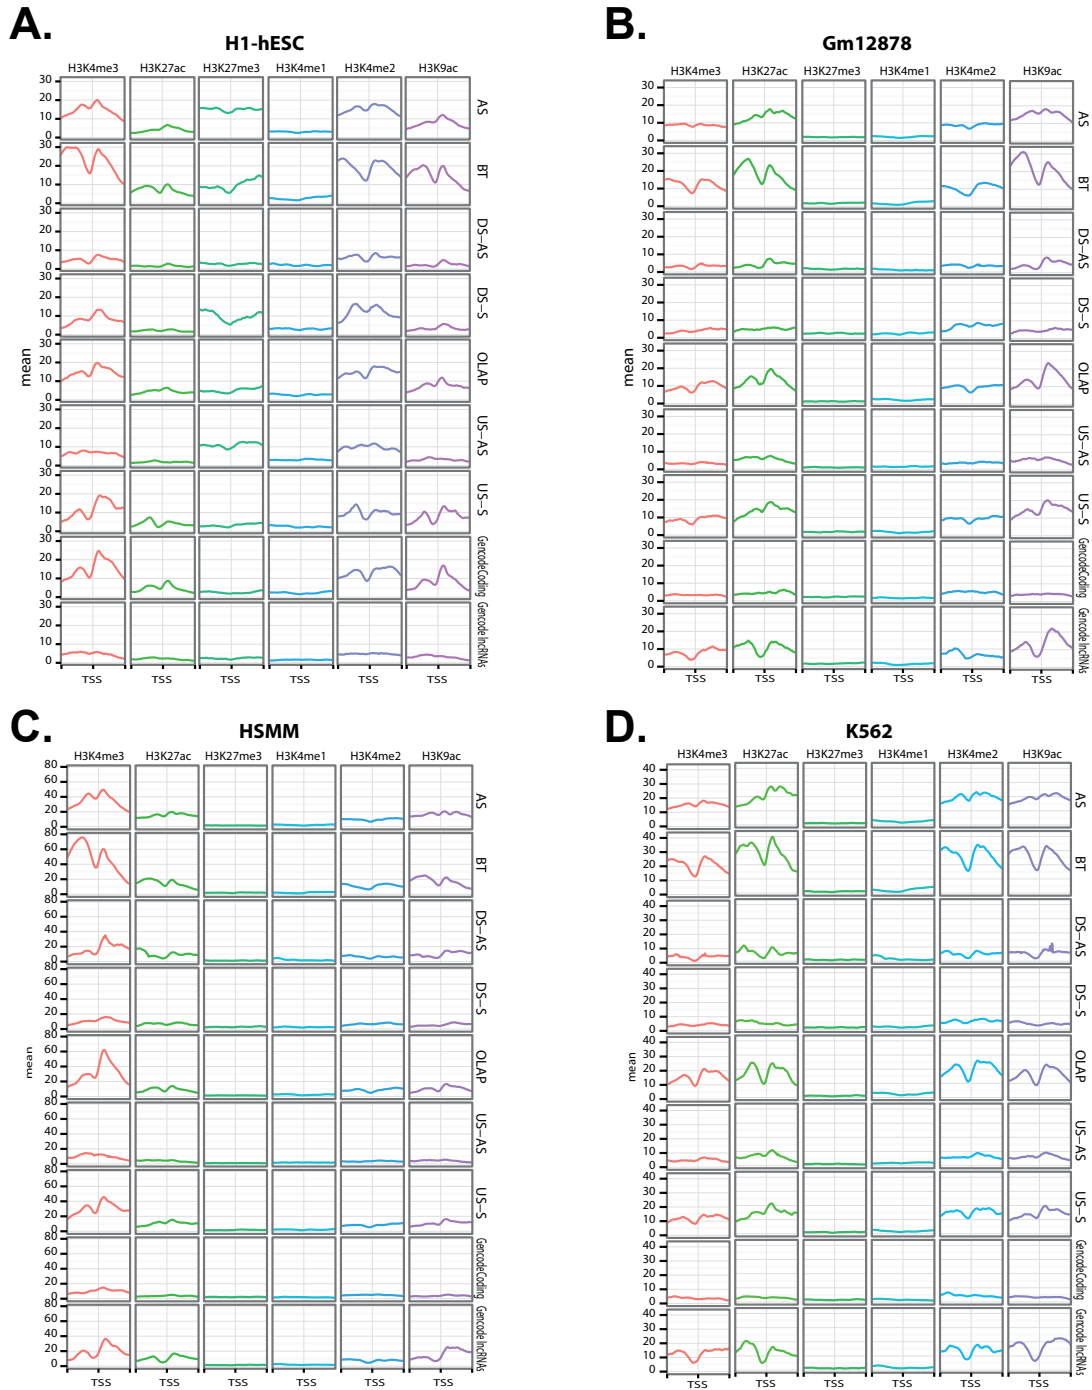

Figure 8: Histone modification profiles of *pcRNA* promoters (split by their relative orientation), promoters of 1000 random Gencode *lncRNAs* and promoters of 1000 random Gencode coding genes based on ChIP-Seq data by the ENCODE project on H1-hESCs (A), GM12878 (B), HSMM (C) and K562 (D). The lines represent the mean ChIP-Seq coverage and the shaded area around the line represents the standard deviation of the mean.

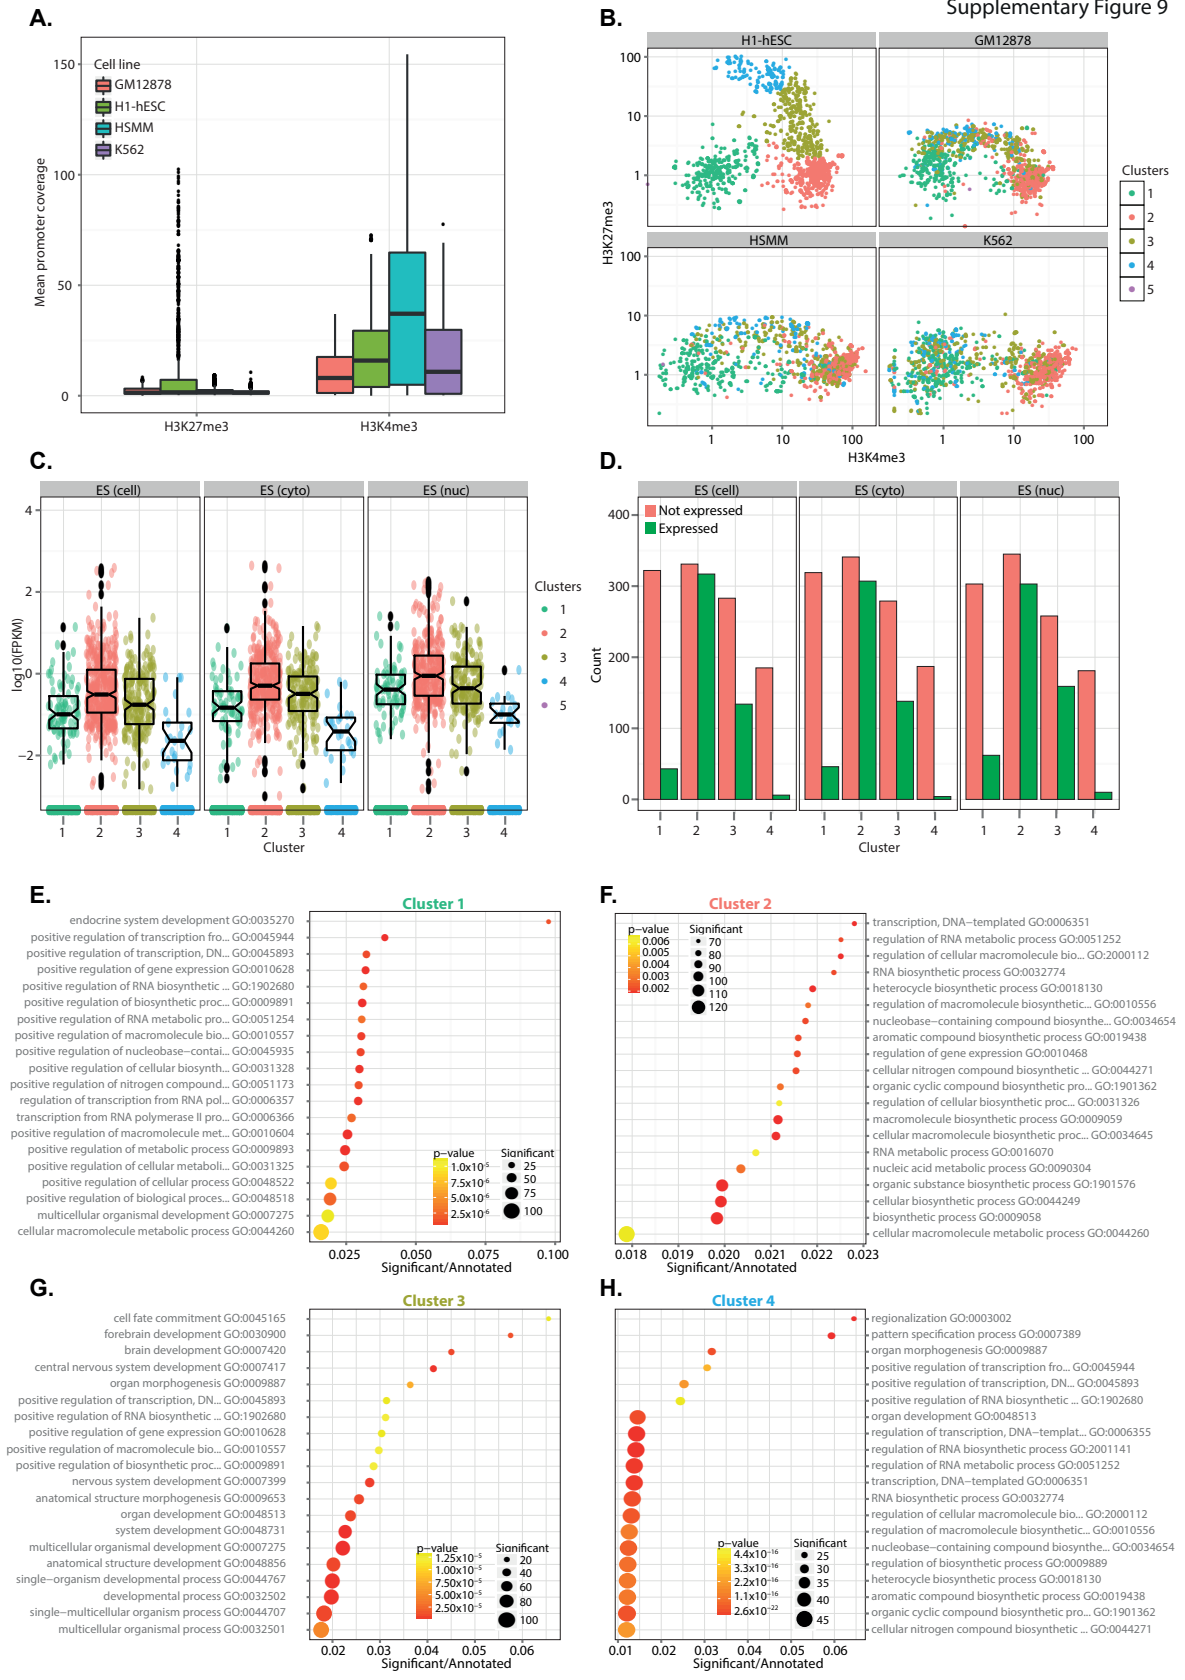

Figure 9: We identified an embryonic stem cell specific signature of pcRNA promoters with high levels of both H3K27me3 and H3K4me3 (bivalent promoters) or high levels of tri-methylation of H3K27 (H3K27me3) and intermediate levels of H3K4me3 (**A,B**). The pcRNAs clustered in these groups show intermediate level or no expression in ES cells, respectively (**C,D**). Whereas both clusters are associated with developmental genes, the bivalent cluster is particularly enriched in central nervous system development (**E-H**). These results suggest these pcRNAs are targets of Polycomb and silenced or transcriptionally poised in undifferentiated pluripotent cells (Bernstein et al., 2006) consistent with roles in differentiation and development. (**A**) Boxplot showing the mean coverage of pcRNA promoters based on ChIP-Seq signal for H3K27me3 and H3K4me3 in GM12878, H1-hESCs, HSMM and K562. (**B**): Scatter plot reporting the signal intensities of H3K4me3 (x-axis) and H3K27me3 (y-axis) in the promoters of pcRNAs. The four subplots represent data from H1-hESCs, GM12878, HSMM and K562. The colour coding reports the hierarchical clustering results. A single pcRNA had 0 H3K4me3 signal in H1hESCs and fell alone in a fifth cluster (not shown). (**C**) Boxplot showing the expression ( $\log_{10}$  FPKM) of pcRNAs based on RNA-Seq data on ES cells (left total cells; middle, cytoplasm; right, nucleus) and split by the cluster determined by applying hierarchical clustering to the H3K27me3 and H3K4me3 ChIP-Seq data (See Supplementary Methods). (**D**) Histograms showing the number of expressed pcRNAs based on RNA-Seq data on ES cells (left total cells; middle, cytoplasm; right, nucleus) and split by the cluster determined by applying hierarchical clustering to the H3K27me3 and H3K4me3 ChIP-Seq data (See Supplementary Methods). pcRNAs with FPKM higher than 0.1 were considered expressed. (**E-H**): GO enrichment analysis of coding genes associated to pcRNAs in each of the clusters determined by applying hierarchical clustering to the H3K27me3 and H3K4me3 ChIP-Seq data (See Supplementary Methods). The x-axis shows the enrichment score, calculated as the number of pcRNA-associated genes in a given GO category divided by the total number of genes in the category. The size of the points indicates the absolute number of pcRNA-associated genes in the given GO category. The color-coding indicates the adjusted p-value.

Supplementary Figure 10

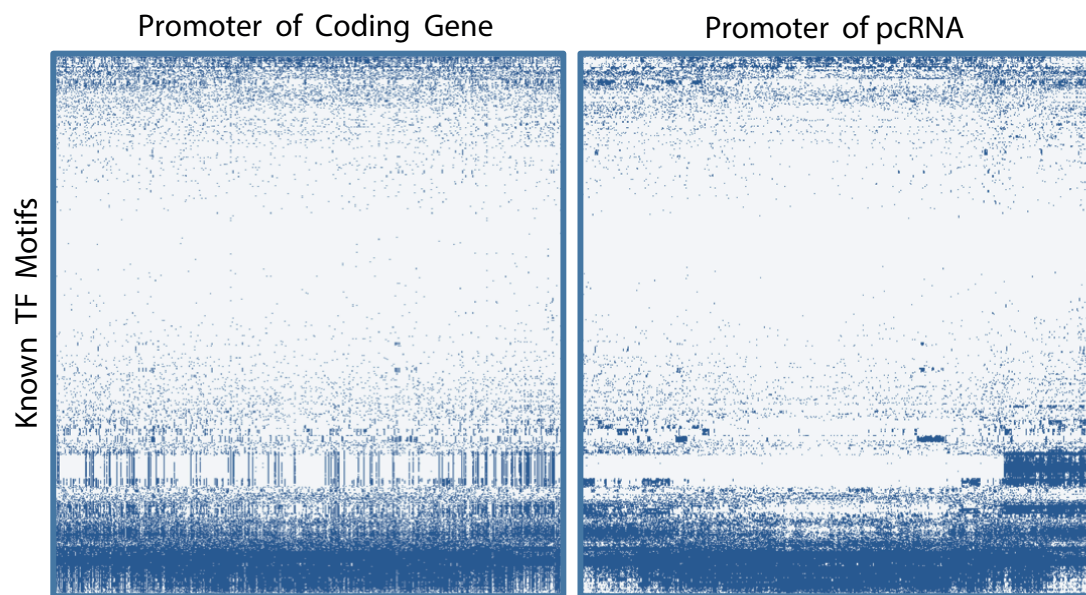

Figure 10: Heatmap indicating what transcription factor binding motifs are found in pcRNA promoters (right) and promoters of pcRNA-associated coding genes (left). The known motifs are from JASPAR (freeze 2014-12-10, 263 motifs) (Kheradpour and Kellis, 2014) (2,065 motifs) and (Jolma et al., 2013) (843 motifs).



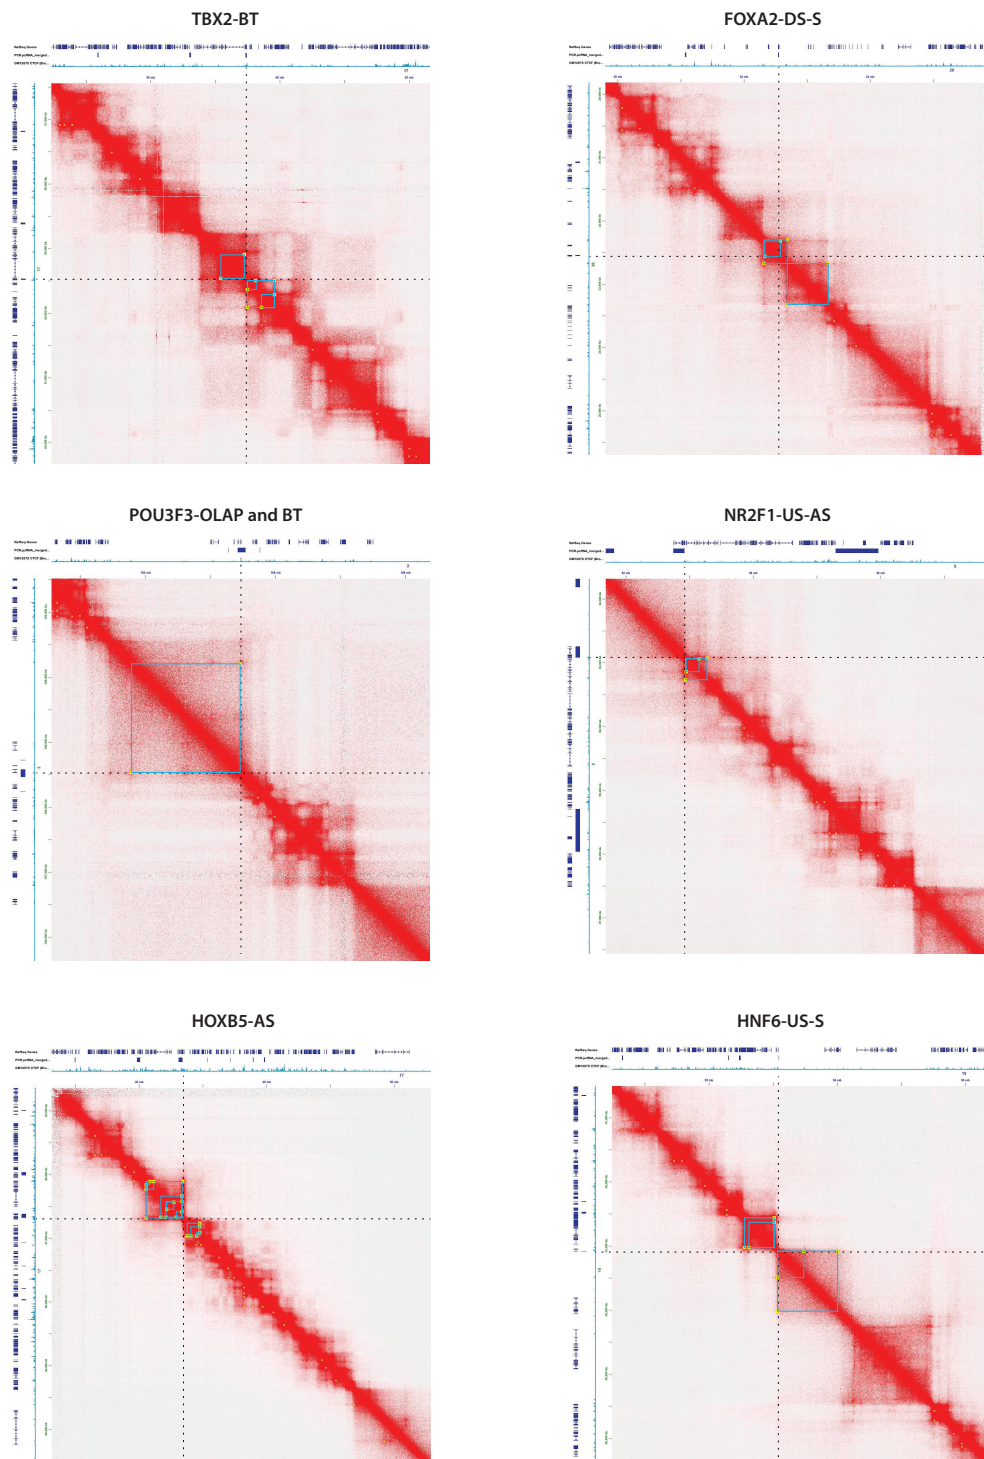

Figure 11: Examples of HiC heat-maps, showing TADs (blue rectangles), loop anchor points (yellow dots), and tapRNA positions (black dotted lines). HiC data from GM12878 cells (Rao et al., 2014), with the first, second and third tracks corresponding to RefSeq coding genes, tapRNAs and CTCF ChIP-seq signal in GM12878, respectively.

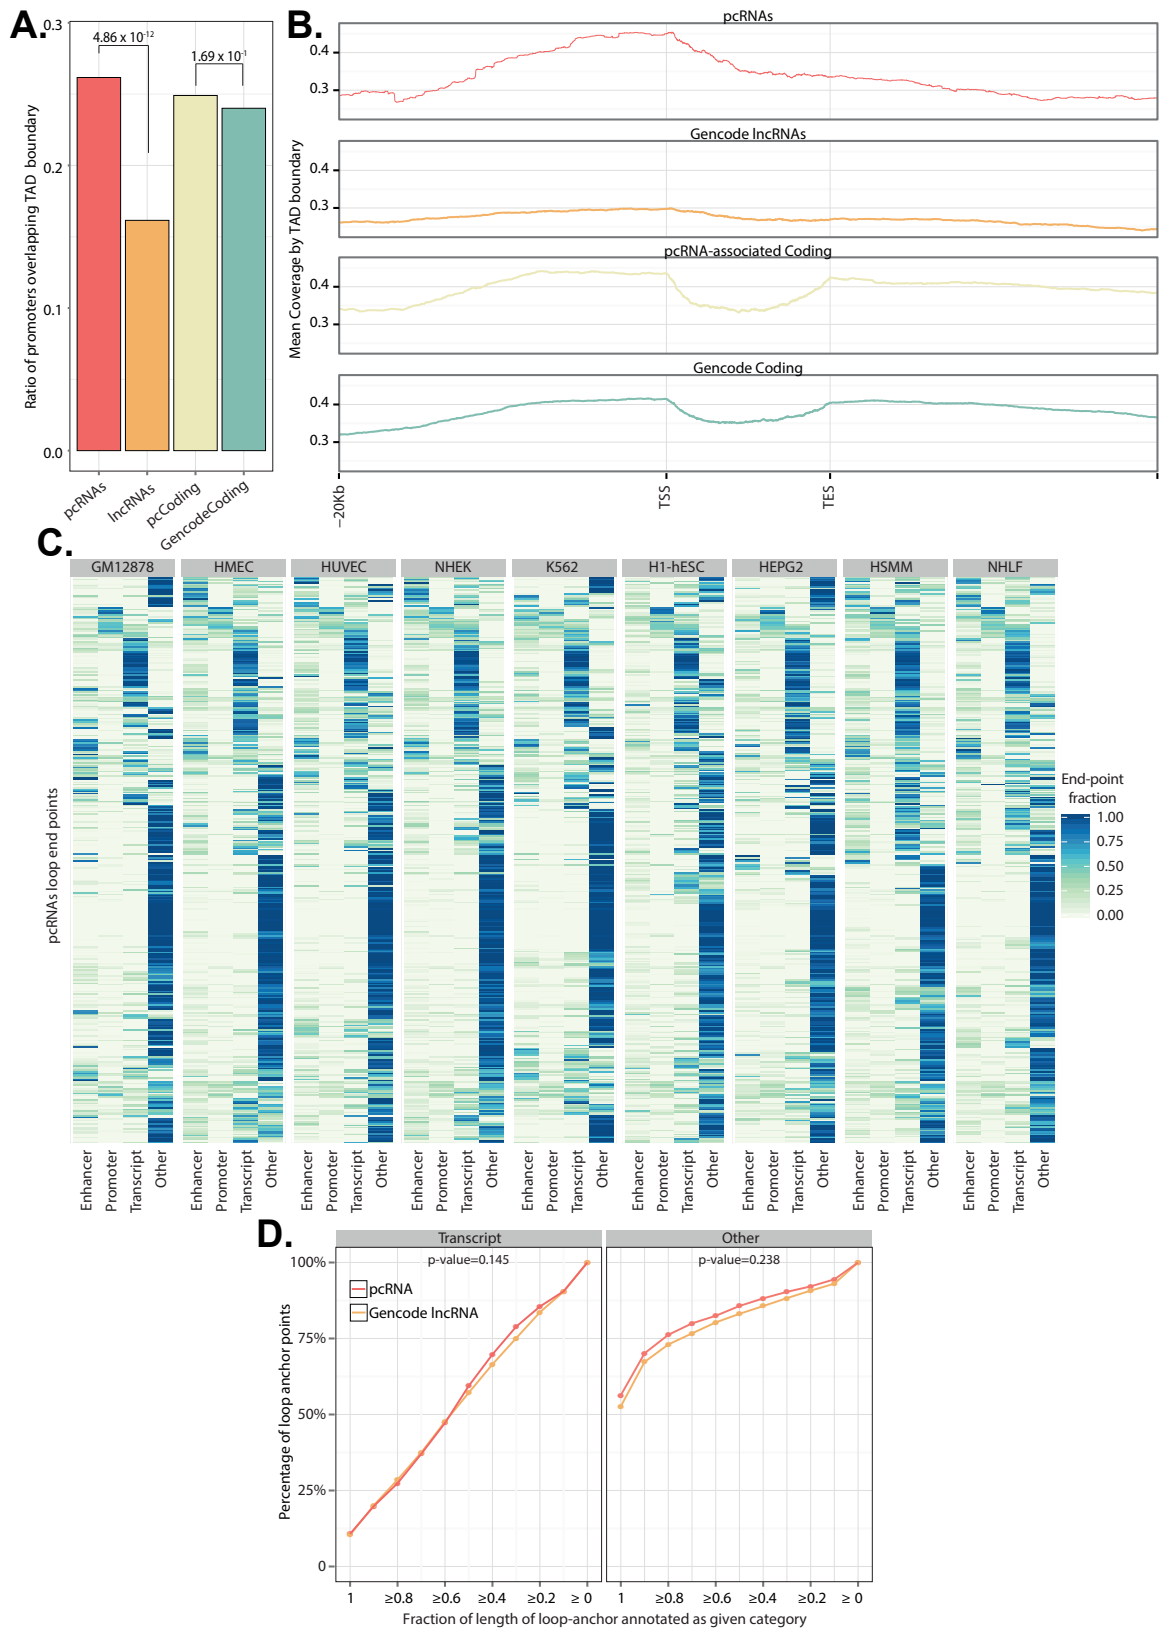

Figure 12: **A:** Bar chart showing the proportion of pcRNAs, pcRNA-associated coding genes, Gencode lncRNAs and Gencode coding genes with a TAD boundary overlapping their promoter. The p-values reported were calculated with hypergeometric tests. **B:** TAD boundary coverage of loci of pcRNAs, pcRNA-associated coding genes, Gencode lncRNAs and Gencode coding genes. The plots report the loci from 20kb upstream of the transcription start site (TSS) to 20kb downstream of the transcription end site (TES). For visualization purposes these profiles show the coverage of a random sample of 5000 Gencode lncRNAs and 5000 random Gencode coding genes **(C)** Heatmap showing the proportion of each distal genomic region in contact with pcRNA promoter annotated in each genomic category derived from the ENCODE chromatin segmentation data (see Supplementary Methods). **(D)** Cumulative distribution plot showing the percentage of distal genomic regions in contact with pcRNA promoters (y-axis) as a function of the fraction of length of loop-end annotated as Transcript (left) or Other (right) according to the ENCODE chromatin segmentation data (see Supplementary Methods).

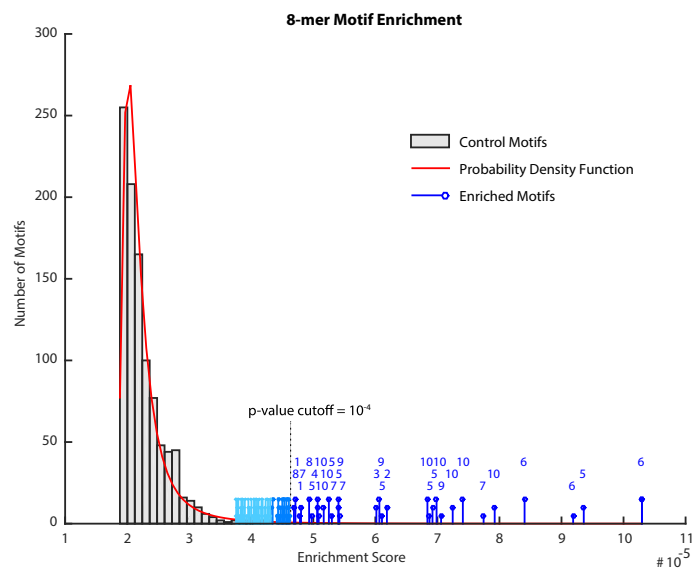

Figure 13: Significantly enriched 8-mer motifs in conserved domains. Probability density function of Monte Carlo simulation results are shown in bar graph. The motifs that have  $p\text{-value} \leq 10^{-4}$  are considered as enriched motifs (shown in blue). The numbers on the enriched 8-mer motif stems are the consensus motif numbers as in **Figure 4D**.

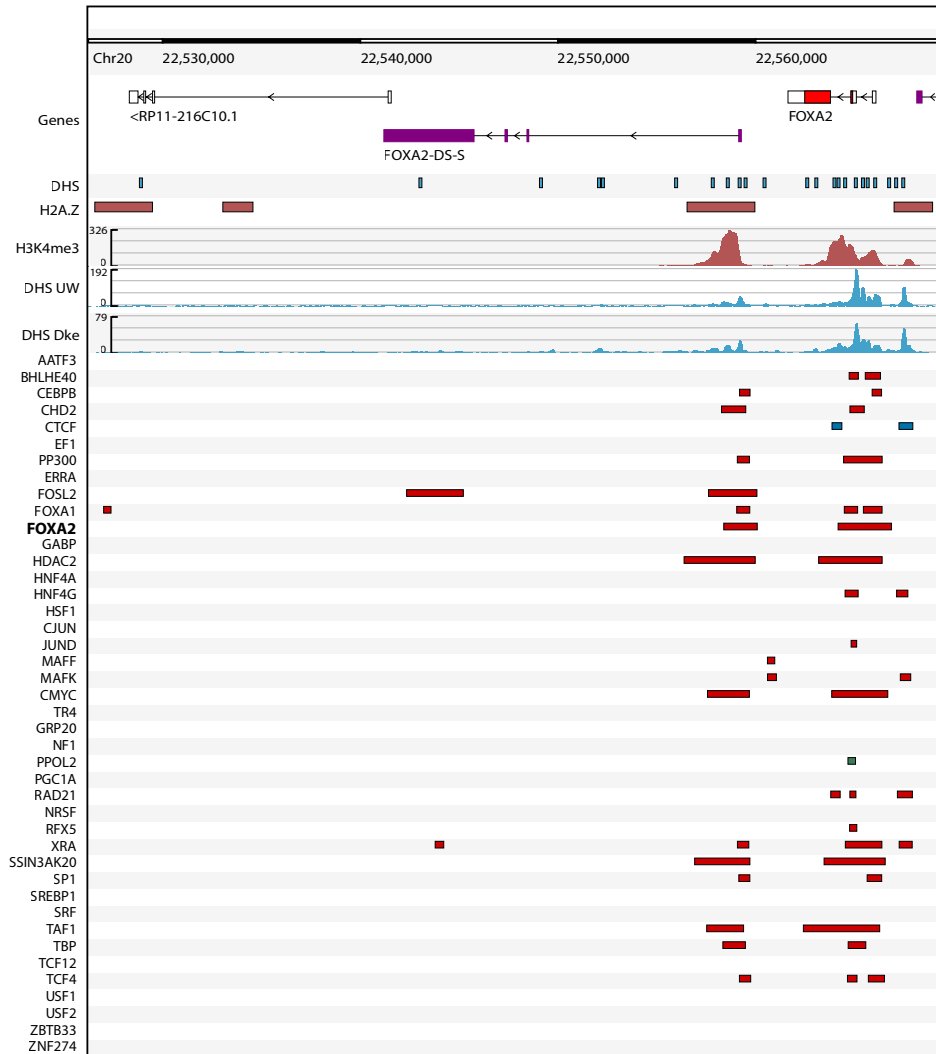

Figure 14: Screenshot from the Dalliace genome browser (Down et al., 2011) showing the FOXA2 locus with tracks displaying coverage data for several ChIP-Seq experiments performed by the ENCODE project on HepG2 cells.

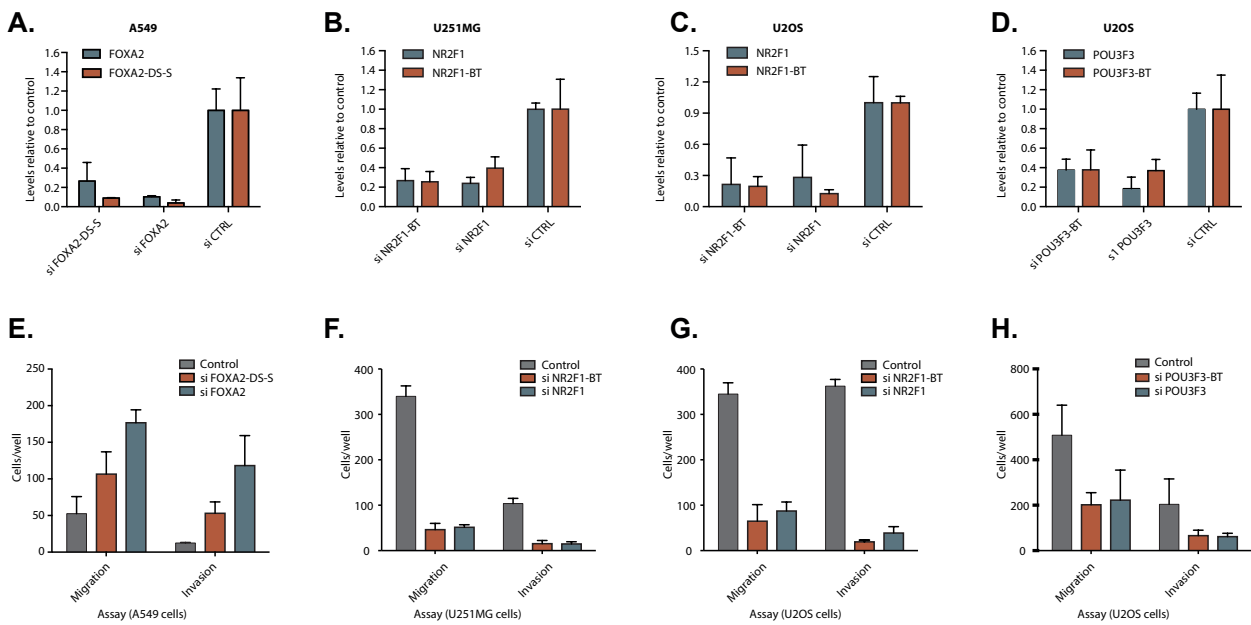

Figure 15: **A-D**: Real time PCR data showing the expression of *pcRNAs* and associated coding genes upon knock-down of FOXA2-DS-S (**A**), NR2F1 (**B**, **C**), POU3F3 (**D**) and their associated *pcRNAs*. (**E-H**) Invasion and migration assay analysis upon knock-down of FOXA2 (**E**), NR2F1 (**F**, **G**), POU3F3 (**H**) and their *pcRNAs* compared to negative control *siRNA*.

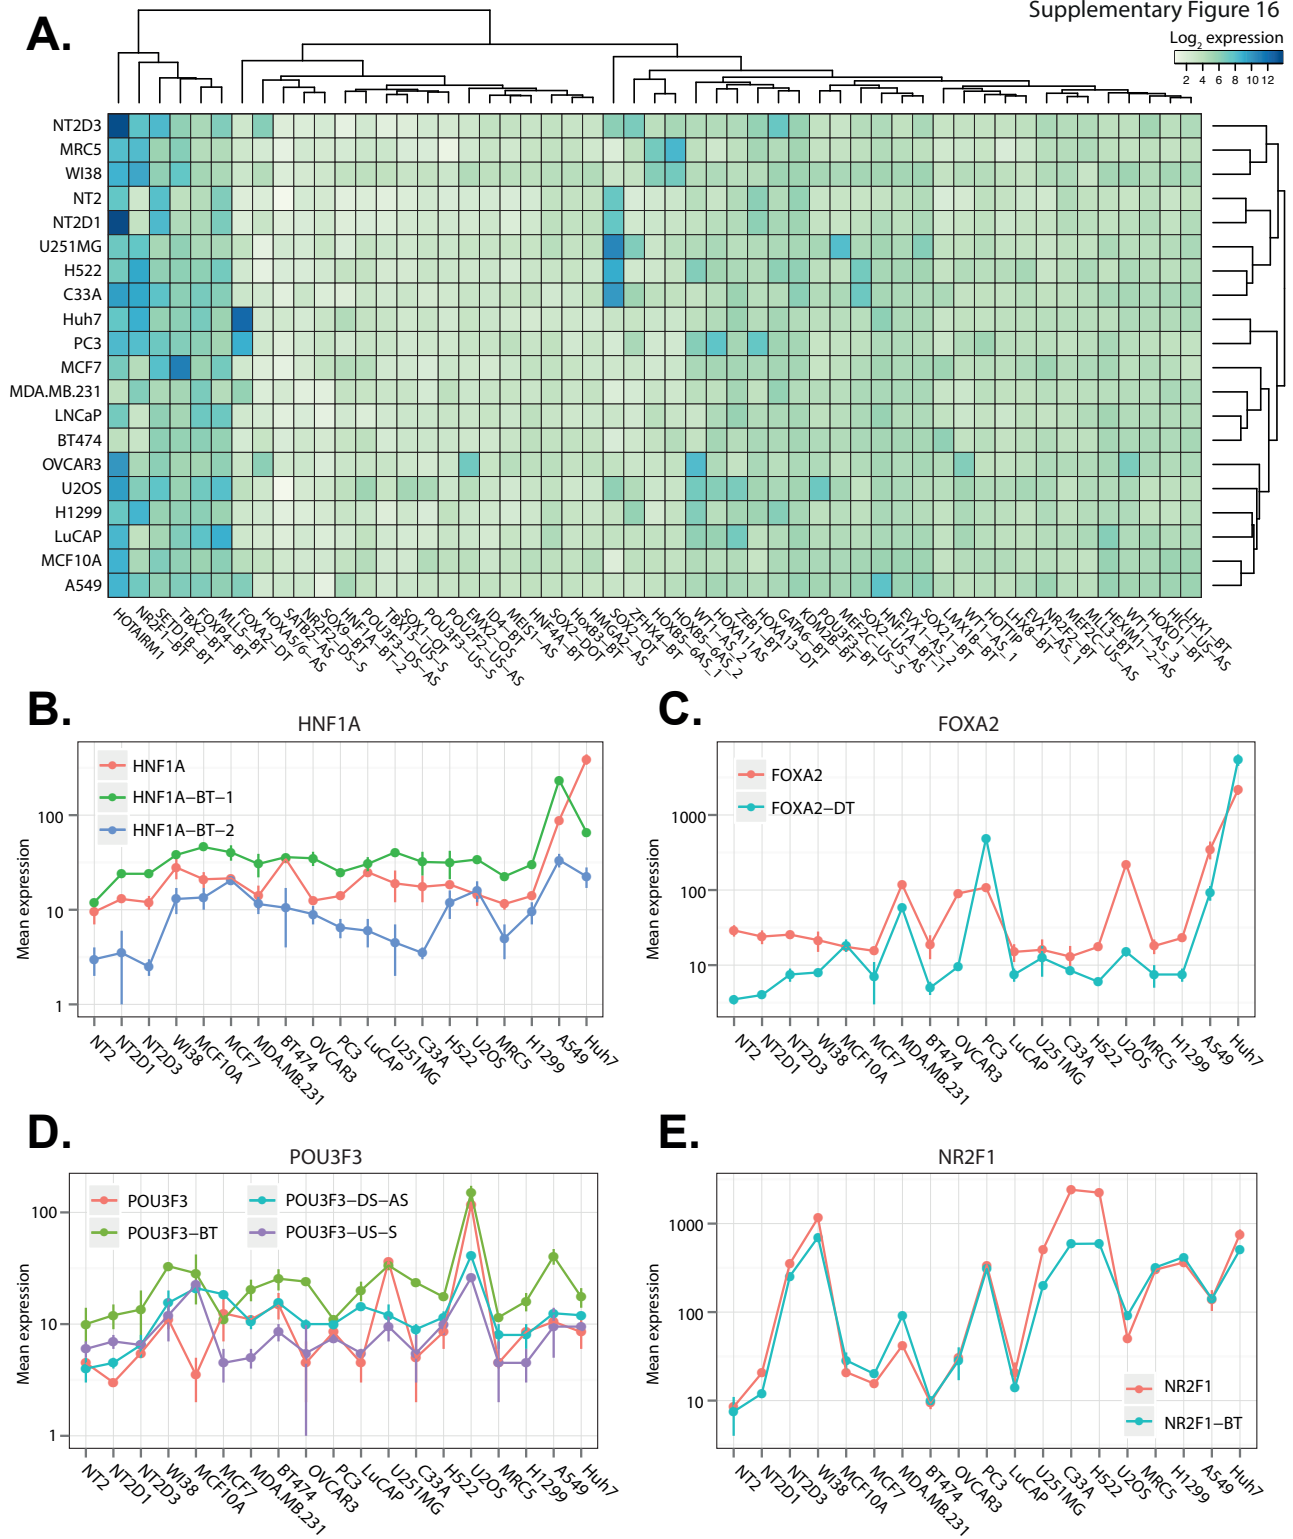

Figure 16: **A:** Heatmap showing the Nanostring expression profiles of human pcRNAs across all the cancer cell lines included in the assay. **(B-E)** Nanostring expression profiles of human pcRNAs HNF1A **(B)**, FOXA2 **(C)**, POU3F3 **(D)** and NR2F1 **(E)** across all the cancer cell lines included in the assay.

## 2 Supplementary Table Legends

**Supplementary Table S1:** List of RNA-Seq datasets used in the study.

**Supplementary Table S2:** Annotation of pcRNAs.

**Supplementary Table S3:** GO enrichment of pcRNA-associated protein coding genes.

**Supplementary Table S4:** GO enrichment protein coding genes associated with pcRNAs in each possible orientation.

**Supplementary Table S5:** Nanostring data. **A:** Annotation of probes used in the assay. **B:** List of samples tested in the assay. **C:** Normalised expression of tested human and mouse pcRNAs and associated coding genes.

**Supplementary Table S6:** Metanalysis of pcRNA expression across different cancer studies. **A:** Samples used in the meta-analysis. **B:** Expression of pcRNAs. **C:** Expression of pcRNA-associated coding genes. **D:** Summary table with the number of expressed pcRNAs and coding genes in each study.

**Supplementary Table S7:** Oligonucleotides, clones and cell lines used in this study.

**Supplementary Table S8:** CHIP-seq experiment data from the ENCODE Project.



## 3 Supplementary Methods

### 3.1 Human and Mouse reference genomes

The reference genomes for human (hg38) and mouse (mm10) were downloaded from the UCSC FTP server (Rosenbloom et al., 2015) in 2bit format and converted to fasta format using the twoBitToFa tool from the UCSC genome browser. The fasta files were indexed using samtools faidx (v1.2).

The Bowtie index for both genomes were built with bowtie2-build (v2.1.0) (Langmead and Salzberg, 2012).

### 3.2 Human and Mouse reference transcriptomes

The reference gencode transcriptomes for human and mouse (version 21 for human and version M4 for mouse) were obtained from the Gencode website in GTF format (Harrow et al., 2012).

### 3.3 Genbank all RNAs

The annotation of mouse Genbank mRNAs was obtained from the “Mouse mRNAs from GenBank” track of the UCSC genome browser using the Table Browser (Karolchik et al., 2004).

### 3.4 RNA-Sequencing data analysis

In order to obtain comprehensive transcriptomes for human and mouse as well as to quantify pcRNA abundance, we integrated the reference Gencode transcriptomes with RNA-Seq data on human and mouse tissues and cell lines. We used RNA-Seq from six matched human and mouse tissues (Brain, Cerebellum, Heart, Kidney, Liver and Testis) as well as data produced by the ENCODE project from similar human and mouse cell lines (Supplementary Table S1).

#### 3.4.1 Mapping

The RNA-Seq datasets were mapped to the reference human and mouse genomes (hg38 and mm10 respectively) using Tophat2 (v2.0.10, bowtie2 v2.1.0 (Kim et al., 2013; Langmead and Salzberg, 2012)) with the options `--b2-sensitive --zpacker pigz` and the Gencode comprehensive GTF files as reference transcriptomes (v21 and M4 for human and mouse respectively). The reference transcriptomes were built with an independent Tophat run without fastq files and then provided to all subsequent mapping runs through the option `--transcriptome-index`

The `--library-type` option was set to “fr-unstranded” for unstranded datasets and “fr-firststrand” for stranded datasets.

For two very deep (>120mln reads each), single end 45nt reads mouse datasets (SRR549335 and SRR549339, see Supplementary Table S1) Tophat by default tried to identify splice junction by coverage search, but stopped at the stage “Searching for junctions via segment mapping” probably due to the very high number of reads. To overcome this problem, we disabled only for these two samples the coverage-search functionality (option `--no-coverage-search`) as suggested by Tophat’s standard error.

#### 3.4.2 Assembly

The transcriptomes were assembled independently for each RNA-Seq dataset using Cufflinks (v2.2.1) with the following options:

`--library-type` “fr-unstranded” for unstranded datasets and “fr-firststrand” for stranded datasets.

`-F 0.05`

`--multi-read-correct`

`--frag-bias-correct` , pointing to the genome fasta file

`-M` a masking GTF files to exclude ribosomal transcripts and mitochondrial transcripts. This file was produced by selecting from the Gencode GTF files the lines that matched “Mt\_” or “rRNA” in field 14.

`-g` exon-cds-filtered reference transcriptome GTF. This file was produced by selecting only exon and CDS features from the Gencode reference GTF files (field 3), therefore excluding the “gene” and “transcript” entries. Such a filtered GTF file contains all the information needed by Cufflinks and provides a significant speed up in cufflinks’ running time.

The Cufflinks assembled transcriptomes for each sample were then merged using Cuffmerge (with the same exon-cds reference transcriptome used for Cufflinks) and converted to BED12+ format using the gtfToBed tool (Kent et al., 2002) with the option “-a gene\_id,oId,class\_code” to preserve Gene ID, Gencode ID and Cufflinks class codes as additional fields.

### 3.4.3 Abundance estimation and expression normalisation

The human and mouse merged transcriptomes (merged.gtf) were then quantified against each BAM file using Cuffquant (v2.2.1) with the following options:

`--library-type` (see 3.4.2)

`--multi-read-correct`

`--frag-bias-correct`

`-M` Reference masked regions (see 3.4.2)

Finally, the Cuffquant binary output files were normalised with Cuffnorm (v.2.2.1) to produce the human and mouse expression matrices. Cuffnorm was run with the following options:

`--output-format cuffdiff`

`--use-sample-sheet`

`--library-type fr-unstranded`

## 3.5 Identification of pcRNAs

### 3.5.1 Human Data preparation

The purpose of this data preparation step is to produce an annotation of reference and novel non-coding transcripts from which we will later identify pcRNAs.

#### 1) Annotation of coding transcripts and CDS

From the Gencode BED annotation we selected transcripts containing an annotated CDS. We then used the getCoding tool of Pinstripe (Gascoigne et al., 2012) to obtain a BED annotation of only the coding portion (CDS) of each coding transcript.

#### 2) Reference non coding RNAs

We filtered the Gencode V21 BED file in the following way:

1. We used awk to select all transcripts without an annotated ORF and composed of more than one exon.
2. We used overlapSelect (UCSC genome browser tool (Kent et al., 2002)) to exclude all transcripts that had more than 20bp of sense overlap with the CDS region of a coding transcript.

### 3) *Novel non coding RNAs*

We filtered the merged RNA-Seq transcriptome BED file in the following way:

1. We used awk to remove single exon transcripts as well as transcripts that don't map to the primary assemblies of the autosomes or sex chromosomes.
2. We used overlapSelect to discard transcripts with more than 20bp of sense overlap with the CDS region of a coding transcript.
3. We used bedtools intersect (v2.24.0) to discard transcripts with more than 50% sense exonic overlap with reference non-coding transcripts (previous step).
4. We used Pinstripe dedup (version v1.0.4554.32000, with option --exEncomp) to remove redundant transcripts.
5. We used CPAT (v1.2, (Wang et al., 2013)) to calculate the coding potential of each transcript and only retained transcripts with score  $< 0.364$  (see CPAT documentation for information on the threshold).

Finally, we combined *the Reference non coding RNA* annotation and the *Novel non coding RNAs* annotation and we used bedtools intersect to remove all transcripts with more than 50% sense exonic overlap with coding transcripts (although in the previous step we had already filtered out CDS-overlapping transcripts, this step ensures that we do not have transcripts that have more than 50% overlap with the UTR of coding genes).

The file that we obtain is a comprehensive annotation of all reference and novel human non-coding RNAs and we will hereafter refer to it as *know+novel ncRNAs*.

### 3.5.2 Mouse Data preparation

The purpose of this data preparation step is to produce an annotation of reference and novel non-coding transcripts from which we will later identify pcRNAs.

#### 1) *Annotation of coding transcripts and CDS*

From the Gencode BED annotation we selected transcripts containing an annotated CDS. We then used the getCoding tool of Pinstripe to obtain a BED annotation of only the coding portion (CDS) of each coding transcript.

#### 2) *Reference non coding RNAs*

We filtered the Gencode M4 BED file in the following way:

1. We used awk to select all transcripts without an annotated ORF and composed of more than one exon.
2. We used overlapSelect to exclude all transcripts that had more than 20bp of sense overlap with the CDS region of a coding transcript.

#### 3) *Novel non coding RNAs*

We filtered the merged RNA-Seq transcriptome BED file in the following way:

1. We used awk to remove single exon transcripts as well as transcripts that don't map to the primary assemblies of the autosomes or sex chromosomes.
2. We used overlapSelect to discard transcripts with more than 20bp of sense overlap with the CDS region of a coding transcript.
3. We used bedtools intersect (to discard transcripts with more than 50% sense exonic overlap with reference transcripts (previous step)).
4. We used Pinstripe dedup (with option --exEncomp) to remove redundant transcripts.
5. We used CPAT to calculate the coding potential of each transcript and only retained transcripts with score  $< 0.44$  (see CPAT documentation for information on the threshold).
6. We removed all transcripts with more than 50% sense exonic overlap with a coding transcript to remove UTR overlapping RNAs.

#### 4) Genbank non coding RNAs

Given the lower number of lncRNAs annotated by Gencode in mouse (6951 in Gencode M4 vs 15877 in human Gencode V21), we also incorporated in our analysis Genbank non coding RNAs.

To identify them, we downloaded the “all mRNAs” GTF from the UCSC genome browser and processed it in the following way:

1. We used the gffread tool (v2.2.1, part of the Cufflinks suite) to exclude all transcripts with non-canonical splice sites (i.e. not GT-AG, GC-AG or AT-AC) and with introns shorter than 4nt, then we converted the filtered GTF file to BED with Pinstripe gtfToBed.
2. We retained only transcripts with more than one exon.
3. We discarded transcripts with more than 20bp of sense overlap with the CDS region of a coding transcript (overlapSelect).
4. We used CPAT to calculate the coding potential of each transcript and only retained those with score <0.44 (see CPAT documentation for information on the threshold).
5. We removed all transcripts with more than 50% sense exonic overlap with a coding transcript to remove UTR overlapping RNAs.

### 3.5.3 Identification of conserved promoters

For each transcript in the human *know+novel ncRNAs* annotation (see 3.5.1) we produced a BED file of their promoter regions by extending their TSSs of 500bp in each direction, then we obtained their FASTA sequence from the reference genome using the Pinstripe getDna tool.

In order to make a blast database of the mouse genome we first used the ncbi-blast convert2blastmask tool (v2.2.30+, options `-masking_algorithm repeat -masking_options "repeatmasker and tandem repeats from UCSC" -outfmt maskinfo_asn1_bin`) to extract masking information from the soft masked genome fasta file, and then the makeblastdb tool (v2.2.30+, options `-mask_data path-to-convert2blastmask --out -dbtype nucl`).

We then used the following command line to align human ncRNA promoters to the mouse genome with blast (v2.2.30+):

```
blastn -task blastn --db path/to/db -out path/to/out -query path/to/promoters/fastas -outfmt 6 -evaluate 0.001 -num_threads n-processors -db_soft_mask 40 -lcase_masking
```

Finally, we processed the blastn output file with awk to only retain alignments longer 100nt and with E-value <10<sup>-10</sup> and convert the blast coordinates (1 based) into BED coordinates (0 based).

### 3.5.4 Non-coding to coding positional annotation

We next aimed to associate each ncRNA identified in human and mouse to its closest protein coding transcripts. To this end we used Pinstripe “closest”, which returned – for each input ncRNA – the closest upstream, downstream and overlapping coding transcript. We then processed each entry and compared the non-coding and coding coordinates to annotate their TSS-to-TSS distance as well as the orientation of the non-coding relative to the coding in the following way:

- If the coding and non-coding intervals overlapped we defined the coding-non-coding pair as OLAP if on the same strand or AS if on different strands.
- If there was no overlap and the non-coding was upstream of the coding (relative to the strand of the coding), we defined the pair as US-S if coding and non-coding were on the same strand, otherwise US-AS if the TSS-to-TSS distance was >2000bp or BT if <=2000.
- If there was no overlap and the non-coding was downstream of the coding (relative to the strand of the coding), we defined the pair as DS-S S if coding and non-coding were on the same strand, otherwise DS-AS.

We then matched each human and mouse coding transcript to their corresponding Ensembl Gene Ids, and for each non-coding/coding gene pair in a given orientation we only retained the closest coding transcript.

### 3.5.5 Human-mouse positional comparison

To identify mouse ncRNAs arising from conserved human ncRNA promoters we extended each region in the mouse genome that resulted from blasting human ncRNA promoter (see 3.5.3) of 500nt in each direction, and then we intersected these regions with the 5' exon of each mouse ncRNA.

This step allowed us to obtain pairs of human/mouse ncRNAs that have a conserved promoter. We then selected those pairs for which at least one coding neighbour of the human non-coding (where neighbouring means the closest upstream, downstream and overlapping as defined in the previous step) was orthologous to at least one coding neighbour of the mouse non-coding

To identify orthologous genes between mouse and human we programmatically downloaded from Ensembl Biomart (v80) a table that associates each human gene\_id to the gene\_id of the orthologous gene in mouse.

The resulting annotation contains human and mouse ncRNAs whose promoter is conserved and whose neighbouring gene(s) is(are) orthologous.

We further filtered this annotation by removing all human/mouse ncRNA pairs that were in opposite orientations relative to the coding genes in the two species (i.e. DS-S, US-S or OLAP in one species and AS, BT, DS-AS, US-AS in the other).

In numerous cases we could not univocally associate each ncRNA to a single coding gene, since the same ncRNA can have multiple neighbouring coding genes orthologous and in the same orientation in mouse and human. To resolve these ambiguities and univocally assign each ncRNA to a unique coding gene we applied the following criteria:

- 1) In case any of the possible coding genes were either AS or OLAP in human we retained the closest (TSS-to-TSS) of those.
- 2) In all other cases we retained the coding with shortest TSS-to-TSS distance in human.

### 3.5.6 Annotation of pcRNA genomic characteristics

To annotate pcRNAs that overlapped Gencode lncRNAs we intersected the human pcRNA annotation with the Gencode annotation of lncRNAs considering all exonic sense overlaps.

To annotate pcRNAs that overlapped miRNAs we queried the UCSC genome browser MySQL server for all transcripts containing the string “miR” in the geneName field.

To annotate pcRNA promoters we extended each pcRNA TSS by 2000bp in each direction and merged the resulting promoter regions that overlapped (bedtools mergeBed).

## 3.6 Characterisation of pcRNA features and expression analysis

To produce human and mouse expression matrices we matched the Ensembl Transcript IDs of human and mouse pcRNAs with the “oID” identifiers reported by Cuffmerge; we then used the corresponding Cuffmerge IDs to track pcRNAs in the isoforms FPKM tracking files reported by Cuffnorm.

For human and mouse coding genes we used a similar approach to extract the FPKM transcript information for all transcripts of each coding gene, and then summed the FPKMs to obtain a single expression measure at the gene level.

For the expression analysis all FPKM values below  $10^{-3}$  were set 0 and all transcripts with 0 FPKMs in all samples were excluded.

### 3.6.1 pcRNA expression heatmaps

The expression heatmaps for human and mouse pcRNAs were produced with the function heatmap.2 of the gplots package. The rows and columns were clustered with the default methods. For visualisation purposes

in order to calculate the log<sub>2</sub> of the FPKMs the smallest FPKM value was added to each value. The vertical sidebar reports the tissue specificity score calculated as indicate below.

### 3.6.2 pcRNA expression distance heatmaps

The heatmaps showing the Euclidean distance between pcRNA expression profiles have been realized by calculating the matrix of pairwise Euclidean distances between all pcRNAs using the *dist()* function in R. The heatmap was produced with the *heatmap.2* function of the *gplots* package using the default methods for clustering rows and columns. The horizontal sidebar reports the tissue specificity score calculated as indicate below. The vertical sidebar reports the tissue where a given pcRNA has maximal expression.

### 3.6.3 GO enrichment of pcRNA-associated coding genes

The GO enrichment of pcRNA-associated genes was obtained using the TopGO package of Bioconductor. The ontology mapping used was provided by the package *org.Hs.eg.db*. The background set of coding genes consisted of all human protein coding genes with an annotated mouse ortholog. GO nodes with less than 10 annotated terms were excluded from the analysis. The p-values were calculated using the “default” method of TopGO and Fisher’s Exact test. P-values were corrected using the Benjamini-Hochberg method as implemented in the *p.adjust(method="BH")* function in R. For the GO enrichments of pcRNA-associated genes divided by relative orientation, we used as background the set of all pcRNA-associated coding genes. P-values were calculated as described above but were not corrected for multiple hypothesis testing.

### 3.6.4 Correlation of expression between pcRNAs and coding genes and between human and mouse pcRNAs

To calculate the Spearman’s rank correlation coefficients between human pcRNAs and coding genes we first calculated a matrix of coefficients between each pcRNA and each coding gene, where the diagonal represented the coefficients between each pcRNA and its associated coding gene.

To test whether the mean correlation coefficient was higher than expected by chance we performed a permutation test: we selected 10<sup>6</sup> samples of random coefficients from the entire matrix, and calculated how many times the mean of the random sample was higher or equal to the mean of the diagonal of the matrix. We reported a p-value < 10<sup>6</sup> when none of the random samples’ means was higher or equal to the mean of the diagonal.

The correlation coefficients were calculated in R with the function *cor(method="spearman")*.

The correlation of expression between human and mouse pcRNAs was calculated in the same way. When the same human pcRNA was associated to multiple mouse pcRNAs we calculated the correlation between all pairs.

### 3.6.5 Tissue specificity score and GO enrichment by tissue

The tissue specificity score for human and mouse pcRNAs and coding genes was based on the square root of the Jensen-Shannon divergence as in (Cabili et al., 2011). The p-value for the difference between pcRNAs and coding genes was calculated with the Wilcoxon test as implemented in the *wilcox.test* function in R. To verify whether the difference of tissue specificity score between pcRNAs and coding genes was due to their different expression levels, we used the MatchIt R package (*method="subclass", subclass=5, sub.by="control"*) to subdivide pcRNAs and coding genes in 5 classes so that each class had similar distributions of maximal FPKM. We then calculated the tissue specificity score distribution for each of the 5 classes.

The GO enrichment of pcRNA by tissue of maximal expression was done by selecting the coding genes associated with pcRNAs with maximal expression in the given tissue and with a tissue specificity score above the mean of all specificity scores. The GO enrichment was performed in R using the TopGO package. The background set of coding genes consisted of all pcRNA-associated coding genes. GO nodes with less than 20 annotated terms were excluded from the analysis. The p-values were calculated using the “default” method of TopGO and Fisher’s Exact test. P-values were not corrected for multiple hypothesis testing.

### 3.6.6 Human-mouse conservation analysis

To calculate the sequence conservation of human and mouse pcRNAs we aligned the human and mouse pcRNA sequences using the Needleman–Wunsch algorithm (Needleman and Wunsch, 1970). In case multiple mouse pcRNA isoforms were associated with the same human pcRNAs we performed all possible pairwise alignments and only retained those with the highest sequence identity. Similarly, to calculate the sequence conservation of pcRNA-associated protein coding genes we performed pairwise alignments (Needleman–Wunsch algorithm) between all transcripts of the human gene and all transcripts of the mouse gene, and retained the alignment with the highest sequence identity.

## 3.7 Nanostring analysis

For the nanostring experiment we designed probes to detect 50 pairs of pcRNAs and corresponding coding genes in human and mouse. The probes were designed according to the Nanostring guidelines and to maximize their specificity (Supplementary Table S5) and included 9 house-keeping genes for normalization (*ALAS1*, *B2M*, *CLTC*, *GAPDH*, *GUSB*, *HPRT*, *PGK1*, *TDB*, *TUBB*).

The raw count data were first normalized by Nanostring Technologies with the nSolver software using a two-step protocol. First, data were normalized to internal positive controls, then to the geometric mean of house-keeping genes. The normalised data was then imported into R for further analysis. The correlation of expression between pcRNAs and coding genes was calculated with the *cor()* function in R after averaging replicate samples. To test whether the mean correlation coefficient between pcRNAs and coding gene as well as between human and mouse pcRNA pairs was higher than expected by chance, we used a permutation test as described for the RNA-Seq analysis.

To cluster pcRNAs and coding genes based on their expression profiles with first used the mclxarray tool of MCL (van Dongen, 2008) to produce a graph where nodes represented human pcRNAs and corresponding coding genes, and edges connected nodes with a Pearson correlation coefficients higher than 0.5. We then run MCL on such graph with the inflation parameter set to 3 to identify clusters of pcRNAs and coding genes.

## 3.8 FOXA2-DS-S knock-down microarray analysis

RNA samples were amplified using the TotalPrep 96-RNA amplification kit from Ambion (Applied Biosystems). Briefly, the RNA was converted into cDNA, and amplified by In Vitro Transcription (IVT) to generate biotin-labeled cRNA. The cRNA was then hybridized to the *HumanHT-12 Expression Chips, version 4* following the Direct Hybridization assay.

The data obtained was imported into R and analyzed with the beadarray Bioconductor package (Dunning et al., 2007) and the illuminaHumanv4.db annotation package. We summarized the data for each array using the *summarize()* function of beadarray with default parameters (log2 transformation, removal of outliers with a 3 median absolute deviation cutoff) and removed all probes without a quality score or with a “Bad” quality score in the annotation package. We then normalized the data with the *normaliseIllumina()* function with the quantile method and retrieved Ensembl IDs for each array probe using biomaRt. We then performed the differential expression analysis using limma with the model formula  $\sim 0 + \text{Condition}$ , where Condition identifies the Control samples, FOXA2-KD samples and FOXA2-DS-S samples. We also supplied to the *lmFit()* function a weight for each array estimated using the *arrayWeights()* function. The GO enrichment analysis was performed separately on significantly up-regulated (adjusted p-value < 0.05 and log2 fold change > 0) and down-regulated (adjusted p-value < 0.05 and log2 fold change < 0) genes using the TopGO package. As background set we used all probes in the array with an Ensembl gene id. The GO enrichment was performed with the classic algorithm and p-values calculated with the fishes exact test. P-values were corrected for multiple hypothesis testing using the Benjamini-Hochberg method as implemented in the *p.adjust()* function. All GO terms with less than 20 annotated genes were excluded from the analysis.

### 3.9 Microarray meta-analysis

Probe set sequences of GPL570 platform (Affymetrix Human Genome U133 Plus 2.0 Array) were retrieved from Affymetrix website (<http://www.affymetrix.com/>), and aligned against hg38 human genome assembly using Blat (Kent, 2002). We next removed probe sets with less than 90% identity and coverage, and cross-referenced the remaining ones against the pcRNAs genomic coordinates (BED12 format) and the protein coding genes (Gencode version 23) using BEDtools (Quinlan, 2014). Probe sets were annotated as pcRNA or as coding gene if at least 70% of its sequence mapped to the reference transcript sequence.

We then download from GEO database (<http://www.ncbi.nlm.nih.gov/geo>) 63 microarray studies of GPL570 platform, which contained tumor and non-tumour tissue samples (Figure 6A, Supplementary Table S6). For each study, raw data (CEL files) were processed and normalized using RMA algorithm, and samples were manually classified as “normal” or “tumor” according to the description provided by authors. We used student t-test (fold-change > 1.25 and p-value < 0.005) to identify transcripts differentially expressed in either tumor or normal samples. Spearman correlation was used to compare the expression between the pcRNA and its associated coding gene. Plots were generated using the following R packages: gplots and ggplot2.

### 3.10 pcRNA histone modification profiles

To produce histone modification maps of pcRNA promoters we downloaded the normalised bigWig files from the EBI ENCODE repository for 14 ChIP-Seq experiments (Control, Ctf, H2az, H3k27ac, H3k27me3, H3k36me3, H3k4me1, H3k4me2, H3k4me3, H3k79me2, H3k9ac, H3k9me1, H3k9me3, H4k20me1) in GM12878, H1-hESC, HSMM and K562 cells. We then converted the data to bedGraph format (with bigWigToBedGraph) and used liftOver to convert the coordinates from hg19 to hg38. Then, we used bedtools mergeBed to merge the overlapping intervals and converted the resulting files back to bigWig format (bedGraphToBigWig).

For each cell line we then used the computeMatrix of the Deeptools package (reference point TSS) to calculate the coverage in each ChIP-Seq experiment of each pcRNA as well as of 100 random Gencode lncRNAs and 100 random Gencode coding Genes (random coding genes and lncRNAs selected with Bedtools sample with seed 383847). The resulting matrix was then loaded in R to produced the profile plots.

### 3.11 Analysis of H3K27me3 in ESCs

To study the H3K27me3 profiles of pcRNA promoters, the bedGraph files (in hg38 coordinates, see above for details of conversion from hg19) of H3K27me3 and H3K4me3 in GM12878, H1-hESC, HSMM and K562 have been mapped to the promoters of pcRNAs (defined as TSS +/- 1Kb) using the mapBed tool of bedtools to calculate the mean coverage of each promoter in each cell line. The data was then loaded into R and the data for H1-hESCs was subjected to hierarchical clustering using the hclust function (default parameters) on the Euclidean distances matrix (dist function) between the base 10 logarithms of the mean promoter coverage for H3K27me3 and H3K4me3 (the log10 was calculated after adding 0.01 to each value). The GO enrichment for the coding genes associated to the pcRNAs in each cluster was performed using TopGO (classic algorithm) using the Fisher Exact Test to compute p-values. P-values correction and background set were the same as described for “GO enrichment of pcRNA-associated coding genes”.

### 3.12 ENCODE ChIP-seq data analysis

We downloaded 2,216 ChIP-seq experiment data from the ENCODE Project. The list of the data is in Supplementary Table S8. The data were lifted over from hg19 to hg38. We found overlapping peaks on four different categories: (1) 500bp upstream the promoter region of pcRNA-associated coding genes, (2) 500bp upstream the promoter region of pcRNAs, (3) pcRNA genomic loci, and (4) pcRNA genomic loci but not overlapping with promoter region. To understand the correlation of TF binding patterns in the four categories, we made a binary matrix per category that consists of rows of TFs and columns of pcRNA/coding genes. Hence, the matrix contains connections between TF and pcRNA/associate coding genes. The matrix of category 2 is clustered by Euclidian Distance. To directly compare the TF binding patterns between each category, the other three



matrices were sorted by the same order of the clustered matrix. We used the MatLab function *corr2* to calculate r-value between category (1) and (2). We performed Monte Carlo simulation to calculate the p-value and test the significance of the r-value.

### 3.13 Known TF-binding motif data analysis

We downloaded known TF-binding motifs from JASPAR (freeze 2014-12-10, 263 motifs) (Kheradpour and Kellis, 2014) (2,065 motifs) and (Jolma et al., 2013) (843 motifs). We applied same analytical procedures on these datasets as described in previous section (ENCODE ChIP-seq data analysis).

### 3.14 Identification of CTCF binding sites in pcRNA promoters

To identify CTCF binding sites within pcRNA promoters we downloaded the TFBS clusters (V3) from the ENCODE portal at the UCSC Genome Browser ([wgEncodeRegTfbsClusteredWithCellsV3.bed.gz](http://wgEncodeRegTfbsClusteredWithCellsV3.bed.gz)) and filtered the file for CTCF sites. We then converted the CTCF binding sites to hg38 coordinates using the liftOver tool and calculated how many pcRNA promoters overlapped HiC loops by (1) extending the TSS of each pcRNA by 2kb in both directions, (2) merging overlapping promoters (bedtools merge) and (3) intersecting the promoters with the CTCF sites. We repeated the same procedure for pcRNA-associated genes, Gencode coding genes and Gencode lncRNAs. To test whether pcRNA promoter were significantly enriched in CTCF binding sites compared to Gencode lncRNAs we performed a hypergeometric test as implemented in the *phyper* function in R.

### 3.15 Identification of HiC loops that overlap pcRNAs

We obtained the annotation of HiC loops by downloading the loops list files for HMEC, HUVEC, NHEK, K562, HeLa, KBM7, IMR90 and GM12878 cells deposited on GEO (GSE63525) and converted the intervals into Hg38 coordinates using liftOver. To calculate how many pcRNA promoters overlapped HiC loops we first extended the TSS of each pcRNA by 2kb in both directions, merged overlapping promoters (bedtools merge) and intersected the promoters with the loop coordinates. We also repeated the same procedure for all pcRNA-associated coding genes, Gencode coding genes and Gencode lncRNAs. To test whether pcRNA promoters are significantly enriched in HiC peaks compared to Gencode lncRNAs we performed a hypergeometric test as implemented in the *phyper()* function in R.

We applied the same strategy to identify TAD boundaries overlapping pcRNAs promoters. However, because TAD boundaries are single nucleotides rather than intervals, we extended each boundary of 10kb in each direction.

To analyze the end-points of the loops that overlap pcRNA promoters we downloaded the ENCODE Broad HMM data (Ernst et al., 2011) from the UCSC repository for GM12878, H1-hESC, HEPG2, HMEC, HSMM, HUVEC, K562, NHEK and NHLF cells. After converting the coordinates to Hg38 with liftOver we intersected each HMM dataset with the coordinates of the end points of the loops that overlapped pcRNAs or – as a control – all Gencode lncRNAs.

The data were then loaded into R for further analysis. First, we simplified the data by reducing the number of HMM categories in the following way: Strong and Weak Enhancer categories were grouped as Enhancer; Active, Weak and Poised promoter were grouped as Promoter; Txn\_Elongation, Txn\_Transition and Weak\_Txn were grouped as Transcript; everything else was grouped as Other.

Then, for each end-point in each cell line we calculated the fraction covered by each HMM category and plotted these data as a heatmap using the heatmap.2 function of the gplots package. To determine whether pcRNA-loop end-points were enriched in any specific HMM category we calculated for each HMM category  $x$  the fraction of end-points annotated as  $x$  for at least  $y\%$  of their length, where  $y$  ranged from 1 to 0 in steps of 0.1. Finally, we compared this distribution to the distribution obtained for all Gencode lncRNAs using the Kolmogorov-Smirnov test (as implemented in the *ks.test()* function in R).

### 3.16 TAD/Loop Boundary Enrichment Analysis

To check whether pcRNAs are localized at the boundary of TAD/Loop, we generated a density plot that shows cumulated count of pcRNA appearance across TAD/Loop regions (for each TAD including 10% proximity regions outside the TADs). Firstly, we extended the TSS of each pcRNA by 2kb in both directions, merged overlapping promoters (bedtools merge). Secondly, we extended TAD regions by 10% in both directions. We then intersected the promoters with the Loop coordinates and the extended TAD coordinates (bedtools intersect).

To visualize the cumulated count as a density plot, we only cumulated 10-bp window centered by TSS of each overlapping pcRNA to show precise localization of pcRNA TSS. We used all lncRNAs in the Gencode database (excluding pcRNAs) as a control. We then performed Kolmogorov-Smirnov test (as implemented in the `kstest2` function in MatLab) to check how the enrichment is significant.

### 3.17 PhastCons Conservation Analysis

To understand the general conservation level of pcRNAs, we used phastCons scores for multiple alignments of 99 vertebrate genomes to the human genome. We downloaded wigFix format files from UCSC database to analyze at single base-pair resolution (<http://hgdownload.cse.ucsc.edu/goldenPath/hg38/phastCons100way/hg38.100way.phastCons/>). We fetched phastCons scores spanning the regions of pcRNA exon. The fetched scores were summed up per pcRNA and then divided by the total length of exons per pcRNA. We also repeated the same procedure for Gencode coding genes and lncRNAs. We then used Kernel smoothing function estimate (as implemented in the `ksdensity` function in MatLab) to plot the density of the normalized phastCons scores per pcRNAs. To test whether pcRNA are significantly conserved than Gencode lncRNAs, we performed Kolmogorov-Smirnov test as implemented in the `kstest2` function in MatLab.

### 3.18 Conserved domain search

To identify conserved domains, we aligned transcribed sequences of human pcRNAs against their counterpart mouse pcRNAs. We took two alignment approaches: sliding-window and exon-by-exon. For the first approach, we made a 200nt-long window on each human pcRNA sequence and shifted the window by 40nt to align against the whole length of the transcribed mouse pcRNA sequence. For the second approach, we took each exon of human pcRNAs and aligned them against the whole length of the transcribed mouse pcRNA sequences. In both approaches, we used MATLAB function `localalign`, which returns local optimal and suboptimal alignments between two sequence. We found highly concordant search results in the results of both approaches and further analyzed the alignments by applying the following steps: (1) retain alignments only if the alignment score is greater than 100 or the ratio of identical matches is greater than 80%, (2) remove duplicate alignments among isoforms of pcRNAs based on merged isoforms of pcRNAs list (3) remove alignments if the aligned regions in human and mouse pcRNAs are not in same order of exons on their transcribed sequences, and (4) retain the best alignment if there are multiple alignments for the same region. Regarding the merged isoforms, we extracted only exonic regions of each pcRNA, and then merged the regions by using the `bedtools merge` function. The merged isoform allowed us to search once per a given genomic region that prevented multiple counting of same conserved domain and motif.

Through this process we generated a heatmap of conserved domains in human pcRNAs and clustered it by using the MATLAB function `kmeans`, which performs k-means clustering to partition the observations of a given matrix into k clusters. We used `kmeans` on the squared Euclidean distance measure and the `k-means++` algorithm for cluster center initialization. We found 16 clusters and merged them into four larger clusters (**Figure 4A**). To annotate the functional category for each of the four clusters, we used the DAVID functional annotation tool with default settings (Huang da et al., 2009).

#### 3.18.1 Motif search in conserved domains

To determine which regulatory motifs are over-represented in conserved domains with respect to background non-conserved regions, we identified all possible ungapped 8-mers in conserved domains and computed their frequency. An 8-mer is considered over-represented if its frequency in conserved domain is significantly higher

than the frequency in background non-conserved region. In the list of over-represented motifs, we found the presence of repeats that are consisted of a single nucleotide or dimer repeated for the entire 8-mer. This phenomenon is common in genomic sequences and generally is associated with non-functional components, and thus, these were filtered out.

To assess the statistical significance of the computed frequency for the over-represented motifs, we generated random sequences according to the nucleotide composition of the original sets of sequences. The frequencies for the random 8-mers were computed, and the distribution of the frequencies was approximated by the extreme value distribution. We used the MATLAB function `gevfit` to compute the maximum likelihood estimation of the extreme value distribution. We then overlaid a scaled version of its probability density function, computed using MATLAB function `gevpdf`, with the histogram of the frequency of the random 8-mer sequences. We repeated this process 100 times for bootstrapping and calculated the p-value. We concluded that the over-representation of the 8-mer motifs in conserved domain is statistically significant if the p-value estimate is less than  $1 \times 10^{-4}$  (**Supplementary Figure S13**).

### 3.18.2 Consensus motifs and De novo motif discovery

To identify consensus motifs, 32 enriched 8-mers were phylogenetically clustered into 10 groups. We used the MATLAB function `seqlinkage` to construct phylogenetic tree from pairwise distances. We then used the MATLAB function `seqlogo` to identify consensus motif and its weight matrix for the clustered 8-mer(s) in each group. We then found known transcription factors per 10 identified consensus that have aligned part of sequence with the consensus by using the MEME suite (Figure 4D).

### 3.18.3 Enriched motif search in enhancer region of the other end of loop anchor points

We checked whether the 32 enriched motifs found in conserved pcRNA domains are also over-represented in enhancer regions on the other end of the loop anchor points. The definitions for enhancer region and loop anchor points are described in previous Method section, "Identification of HiC loops that overlap pcRNAs".

We found pcRNA that overlaps with loop anchor points by using `Bedtools intersect`. The 32 enriched motifs were searched in both pcRNA transcribed sequence as well as enhancer region of the other end of overlapping loop anchor points. We counted a given motif only if the motif was found in both pcRNA and enhancer region. We also searched non-enhancer region of the other end of the loop anchor points as a control set. The counts were normalized by the total length of enhancer or non-enhancer region accordingly (**Figure 4E**).

## 4 Supplementary References

1. Bernstein, B.E., Mikkelsen, T.S., Xie, X., Kamal, M., Huebert, D.J., Cuff, J., Fry, B., Meissner, A., Wernig, M., Plath, K., et al. (2006). A bivalent chromatin structure marks key developmental genes in embryonic stem cells. *Cell* 125, 315-326.
2. Cabili, M.N., Trapnell, C., Goff, L., Koziol, M., Tazon-Vega, B., Regev, A., and Rinn, J.L. (2011). Integrative annotation of human large intergenic noncoding RNAs reveals global properties and specific subclasses. *Genes & development* 25, 1915-1927.
3. Down, T.A., Piipari, M., and Hubbard, T.J. (2011). Dalliace: interactive genome viewing on the web. *Bioinformatics (Oxford, England)* 27, 889-890.
4. Dunning, M.J., Smith, M.L., Ritchie, M.E., and Tavare, S. (2007). `beadarray`: R classes and methods for Illumina bead-based data. *Bioinformatics (Oxford, England)* 23, 2183-2184.
5. Ernst, J., Kheradpour, P., Mikkelsen, T.S., Shores, N., Ward, L.D., Epstein, C.B., Zhang, X., Wang, L., Issner, R., Coyne, M., et al. (2011). Mapping and analysis of chromatin state dynamics in nine human cell types. *Nature* 473, 43-49.

6. Gascoigne, D.K., Cheetham, S.W., Cattenoz, P.B., Clark, M.B., Amaral, P.P., Taft, R.J., Wilhelm, D., Dinger, M.E., Mattick, J.S. (2012). Pinstripe: a suite of programs for integrating transcriptomic and proteomic datasets identifies novel proteins and improves differentiation of protein-coding and non-coding genes. *Bioinformatics* 28, 3042-3050.
7. Harrow, J., Frankish, A., Gonzalez, J.M., Tapanari, E., Diekhans, M., Kokocinski, F., Aken, B.L., Barrell, D., Zadissa, A., Searle, S., et al. (2012). GENCODE: the reference human genome annotation for The ENCODE Project. *Genome research* 22, 1760-1774.
8. Huang da, W., Sherman, B.T., and Lempicki, R.A. (2009). Systematic and integrative analysis of large gene lists using DAVID bioinformatics resources. *Nature protocols* 4, 44-57.
9. Jolma, A., Yan, J., Whittington, T., Toivonen, J., Nitta, K.R., Rastas, P., Morgunova, E., Enge, M., Taipale, M., Wei, G., et al. (2013). DNA-binding specificities of human transcription factors. *Cell* 152, 327-339.
10. Karolchik, D., Hinrichs, A.S., Furey, T.S., Roskin, K.M., Sugnet, C.W., Haussler, D., and Kent, W.J. (2004). The UCSC Table Browser data retrieval tool. *Nucleic acids research* 32, D493-496.
11. Kent, W.J. (2002). BLAT--the BLAST-like alignment tool. *Genome research* 12, 656-664.
12. Kent, W.J., Sugnet, C.W., Furey, T.S., Roskin, K.M., Pringle, T.H., Zahler, A.M., and Haussler, D. (2002). The human genome browser at UCSC. *Genome research* 12, 996-1006.
13. Kheradpour, P., and Kellis, M. (2014). Systematic discovery and characterization of regulatory motifs in ENCODE TF binding experiments. *Nucleic acids research* 42, 2976-2987.
14. Kim, D., Pertea, G., Trapnell, C., Pimentel, H., Kelley, R., and Salzberg, S.L. (2013). TopHat2: accurate alignment of transcriptomes in the presence of insertions, deletions and gene fusions. *Genome biology* 14, R36.
15. Langmead, B., and Salzberg, S.L. (2012). Fast gapped-read alignment with Bowtie 2. *Nature methods* 9, 357-359.
16. Needleman, S.B., and Wunsch, C.D. (1970). A general method applicable to the search for similarities in the amino acid sequence of two proteins. *J Mol Biol* 48, 443-453.
17. Quinlan, A.R. (2014). BEDTools: The Swiss-Army Tool for Genome Feature Analysis. *Current protocols in bioinformatics / editorial board, Andreas D Baxevanis [et al]* 47, 11 12 11-11 12 34.
18. Rao, S.S., Huntley, M.H., Durand, N.C., Stamenova, E.K., Bochkov, I.D., Robinson, J.T., Sanborn, A.L., Machol, I., Omer, A.D., Lander, E.S., et al. (2014). A 3D map of the human genome at kilobase resolution reveals principles of chromatin looping. *Cell* 159, 1665-1680.
19. Rosenbloom, K.R., Armstrong, J., Barber, G.P., Casper, J., Clawson, H., Diekhans, M., Dreszer, T.R., Fujita, P.A., Guruvadoo, L., Haeussler, M., et al. (2015). The UCSC Genome Browser database: 2015 update. *Nucleic acids research* 43, D670-681.
20. van Dongen, S. (2008). Graph Clustering Via a Discrete Uncoupling Process. *SIAM Journal on Matrix Analysis and Applications* 30, 121-141.
21. Wang, L., Park, H.J., Dasari, S., Wang, S., Kocher, J.P., and Li, W. (2013). CPAT: Coding-Potential Assessment Tool using an alignment-free logistic regression model. *Nucleic acids research* 41, e74.
